# Supplementary material for: Water sources aggregate parasites, with increasing effects in more arid conditions
Source: Research Square preprint supplement (doi:10.21203/rs.3.rs-550312/v1), 2021-06-04
Supplement: Supplementary file 1 [file 308dbd2bd388d6cb11ba23f3.docx]

**Supplementary Information for**

Water sources aggregate parasites, with increasing effects in more arid conditions

Titcomb, Georgia; Mantas, John Naisikie; Hulke, Jenna; Rodriguez, Ivan; Branch, Douglas; Young, Hillary

Georgia Titcomb

Email: [georgiatitcomb@gmail.com](mailto:georgiatitcomb@gmail.com)

Contents

[Supplementary Information Text 2](#_Toc72327368)

[Camera trapping methods 2](#_Toc72327369)

[Herbivore dung measurements 2](#_Toc72327370)

[Fecal egg counts literature search 3](#_Toc72327371)

[Herbivore activity analyses 3](#_Toc72327372)

[Log-ratios of dung density 3](#_Toc72327373)

[Comparisons between filled pans and dry sites 4](#_Toc72327374)

[Fig. S1. Parasite Safari Classifications 5](#_Toc72327375)

[Fig. S2. Parasite Safari Validation 6](#_Toc72327376)

[Fig. S3. Dung drying observations 7](#_Toc72327377)

[Fig. S4. Daily Animal Activity 8](#_Toc72327378)

[Fig. S5. Activity Across a Rainfall Gradient 9](#_Toc72327379)

[Fig. S6. Parasite Density Near Water 10](#_Toc72327380)

[Fig. S7. Host-specific Dung and Parasite Density Experimental Results 11](#_Toc72327381)

[Fig. S8. Host-specific Dung and Parasite Density Observational Results 12](#_Toc72327382)

[Fig. S9. Parasite Density in Soils 13](#_Toc72327383)

[Table S1. Pathological Effects of Nematodes 14](#_Toc72327384)

[Table S2. Host and Nematode Checklist 15](#_Toc72327385)

[Table S3. Experimental System Camera Deployments 18](#_Toc72327386)

[Table S4. Observational System Camera Deployments 19](#_Toc72327387)

[Table S5. Dung Properties 20](#_Toc72327388)

[Table S6. Fecal Egg Counts 21](#_Toc72327389)

[Table S7. Experimental System Herbivore Activity GLMM Results 23](#_Toc72327390)

[Table S8. Observational System Herbivore Activity GLMM Results 25](#_Toc72327391)

[Table S9. Experimental System Log-Ratio LMM Results 26](#_Toc72327392)

[Table S10. Post-hoc Tests for Log-Ratio LMMs 27](#_Toc72327393)

[Table S11. Observational System Log-Ratio LMM Results 28](#_Toc72327394)

[Table S12. Experimental System GLMMs for Matrix Sites 29](#_Toc72327395)

[Table S13. Experimental System Estimated Exposures 31](#_Toc72327396)

[Table S14. Observational System Estimated Exposures 32](#_Toc72327397)

[SI References 33](#_Toc72327398)

Supplementary Information Text

Camera trapping methods

Experimental sites

*Setup:* We established cameras at both our drained and filled water pans for the duration of the experiment. We positioned cameras to capture animal movements at each water pan and performed walk tests to determine detection distances prior to deployment. All cameras had maximum detection distances between 12 and 15 meters across sites. Cameras were set to take 3 image bursts if movement or heat was sensed with minimal delay (1-5 seconds). We maintained cameras for a two-year period from August 2016 – August 2018, servicing on a monthly basis.

*Identifications:* We uploaded photographs from all cameras to a citizen science website (https://www.zooniverse.org/projects/gtitcomb/parasite-safari) where volunteers assisted in classifying photographs by counting animals (Figure S1). Image sets were retired after 5 classifications. An animal was determined to be present if at least 3 of the 5 classifications stated its presence and counts for each activity were averaged across classifications.

*Validation:* We compared 2195 identifications performed by the public and by study authors. Public identifications showed strong overlap with classifications performed by the study authors: 99% of species identified by the public were also identified by study authors, and 91% of species identified by authors were identified by the public (members of the public occasionally missed a second species in a photograph). Counts of animals present were also tightly correlated (Figure S2).

*Data aggregation:* The final dataset was created by calculating independent triggers: sequences of classifications that occurred within uninterrupted five-minute periods. We assumed that single-photo triggers corresponded to five seconds of animal presence. We then integrated animal counts within these triggers by multiplying the average count over the course of a trigger by the duration of the trigger. We calculated daily individual * seconds at each site for each animal by summing within each day that the camera was running. We analyzed data from a total of 709 trap nights across water pans from the three stages of the experiment, focusing our analyses on the dry season (June – October), as heavy rains during the wet season periodically provided small amounts of water in drained pans (Table S3).

Observational sites

We also placed cameras at observational water sources and dry sites at Mpala Research Centre to compare animal activity using the same methods as the experimental sites. From April to August 2017, we placed one camera at each water source and dry site for at least two weeks. Of these deployments (n=34), 12 sites ran uninterrupted for a minimum of one week at both water sources and dry sites simultaneously (n=24 deployments; 387 trap nights total, Table S4). Images were classified by study authors by counting animals of each species. Independent triggers (images taken within a five minute interval (6)) and animal activity (individual * seconds) were then calculated in the same manner as for the experimental sites.

Herbivore dung measurements

*Determination of ‘fresh’* vs *‘old’* dung:

Before the experiment began, we collected fresh dung from herbivore species included in the study (defecation was directly observed). Dung was weighed and dimensions of pellets were taken. For elephant and buffalo, a 30cm3 sample was used. We placed dung in the field for two weeks and reweighed at several intervals. We found that most dung samples were very dry by day three (Figure S3); therefore, we used visible internal and external moisture content, presence of arthropods, and odor to gauge whether dung was fresh or old during our subsequent surveys. Dung quantification was applied consistently across all surveys and treatment locations by the same surveyor (J. Mantas).

*Dung volume calculation:*

To expedite field measurements, we devised a methodology to calculate the approximate volume of herbivore dung in each quadrat. For species that did not have easily countable pellets (elephants, buffalo, cattle), we counted the number of 64 cm2 units of dung for each species found in each quadrat. We then multiplied this by 4 cm for elephants and 2 cm for buffalo and cattle to account for differing average depths. For all other species, we counted the number of pellets and multiplied by standard measurements from (7) to obtain the final volume.

*Physical dung density:*

We used the physical density of dung to convert parasite eggs per gram of feces to eggs per cm3. We used conversions listed in Table S5 based on field measurements described above.

Fecal egg counts literature search

To compare fecal egg counts from the focal species in our study, we conducted a Web of Science literature search using the search criteria TS=((fecal AND egg AND count) AND (cow OR cattle OR elephant OR zebra OR giraffe OR buffalo OR impala)). Of the 299 results, 193 studies were selected based on the relevance of their abstracts, but only 7 contained specific FEC data from any of the focal species located in Africa. We therefore supplemented this search by investigating citations from these studies and by additional Google Scholar searches. All references are provided in Table S6. Mean fecal egg counts reported in studies from the literature search were used to construct Figure 1b in the main text.

Herbivore activity analyses

We built negative binomial GLMMs of herbivore activity (daily individual x seconds) to investigate changes throughout the course of the experiment at filled and drained pans (Table S7 and Table S8). We also compared herbivore activity at observational water sources and dry sites at Mpala Research Centre (Table S9).

Log-ratios of dung density

To enable direct comparisons between filled and experimental pans, we calculated the log ratio for dung density (cm3/m2) at filled and experimental water pans for all parasites, all dung together, and for dung of each of the six most common species (elephants, cattle, zebra, impala, giraffe, and buffalo) (equation below). Note that zebra dung densities reflect both *Equus grevyi* and *Equus burchelli*, as the dung of these two species are indistinguishable.

We used linear mixed-effect models to test the effect of experiment status (pre-draining, during the experiment, and post-refill) on the log ratio of dung density. We also included outward distance and its interaction with status as fixed effects, while period (n=10) and site (n=5) were included as random effects. The best model of dung density log ratio was determined using backwards stepwise selection using the lmerTest package (8), and 95% confidence intervals of model coefficients were determined by bootstrapping the final model 10000 times and calculating the 95% bias-corrected confidence interval, as this method is considered robust to deviations from normal data in mixed effect models (9). If bootstrap intervals found coefficient estimates that overlapped with 0, they were dropped from the final model.

Results are qualitatively similar to results presented in the main text; however, adding a nominal value (+1) to all data resulted in biased estimates for herbivore species with low dung density. Log-ratio models and post-hoc comparisons are therefore presented in Table S10 and Table S11 for ease of interpreting significant effects.

For our observational dataset, we also calculated the log ratios of dung and parasite density at watering holes and at dry sites using the formula:

Log ratios of density at waterholes relative to dry sites were analyzed using linear mixed-effect models testing the interactions between cumulative prior 30-day rainfall, mean annual precipitation, and outward distance, including random effects for site (n=20) and period (n=5). Best models were again determined using backwards stepwise selection using the lmerTest package (8). Final confidence intervals were again determined by bootstrapping the final model 10000 times and calculating the 95% bias-corrected percentile interval. Any non-significant interactions were dropped from the model and re-run. Model coefficients and details are reported in Table S12.

Comparisons between filled pans and dry sites

We also created zero-inflated GLMMs to determine differences in herbivore dung and parasite aggregation between filled pans and matched dry sites throughout the course of the experiment. Results are reported in Table S13.


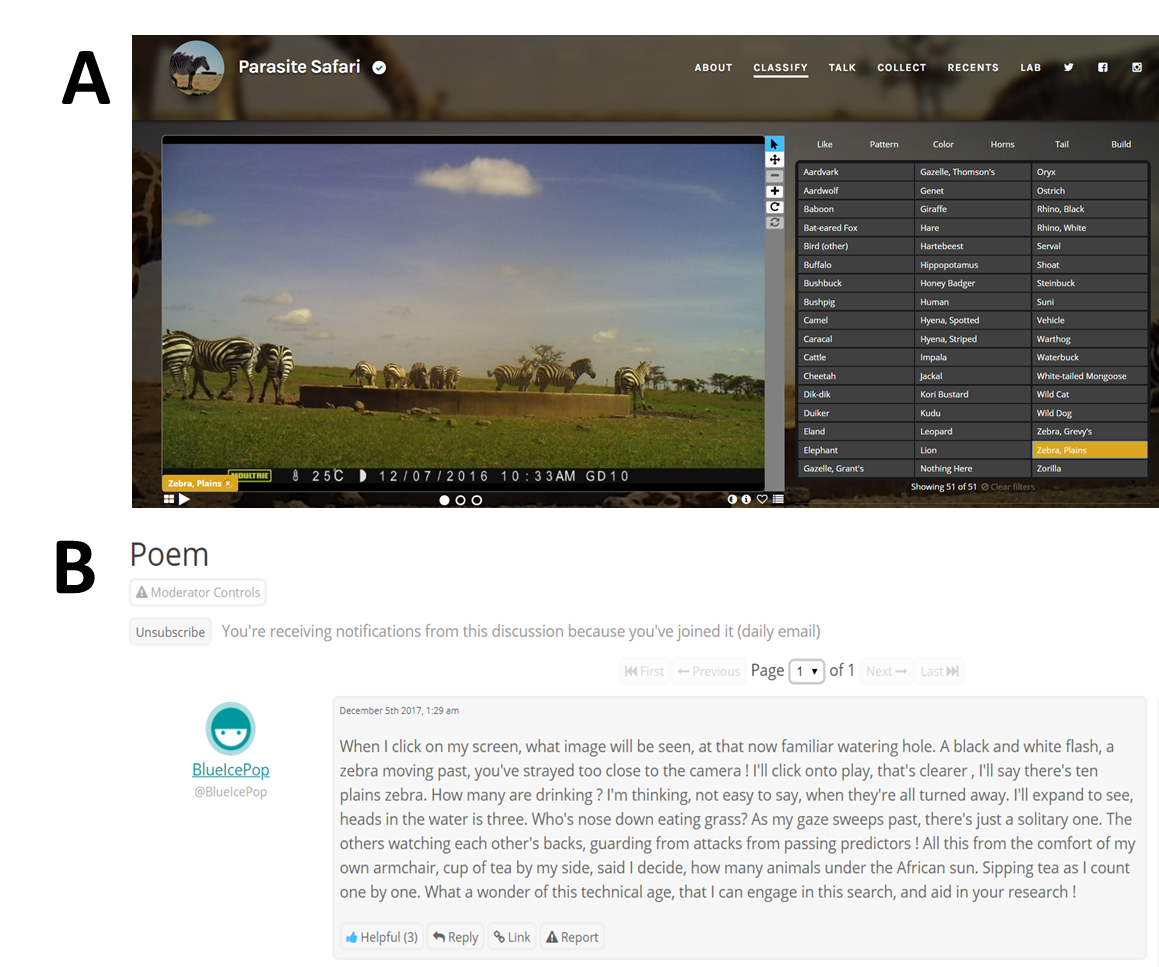


Fig. S1. Parasite Safari Classifications

Classification view on the Parasite Safari website used by members of the public to identify species in each image set.


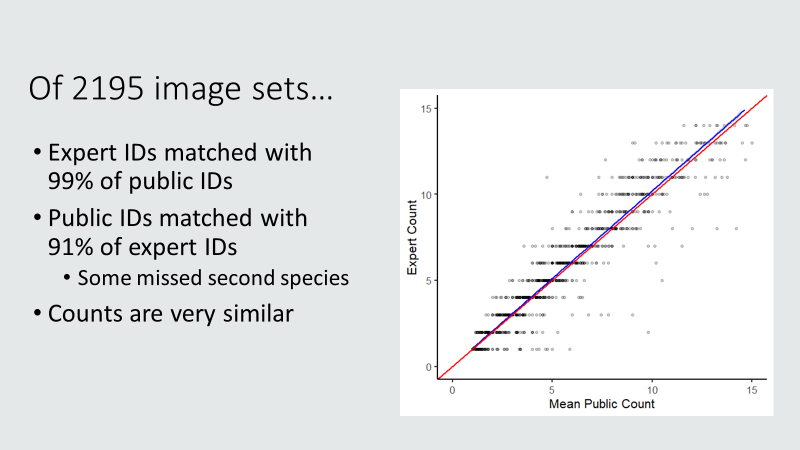


Fig. S2. Parasite Safari Validation

Correlation between counts of animals in each image determined by members of the public and study authors (‘expert count’) shown in blue, and the 1:1 line shown in red.


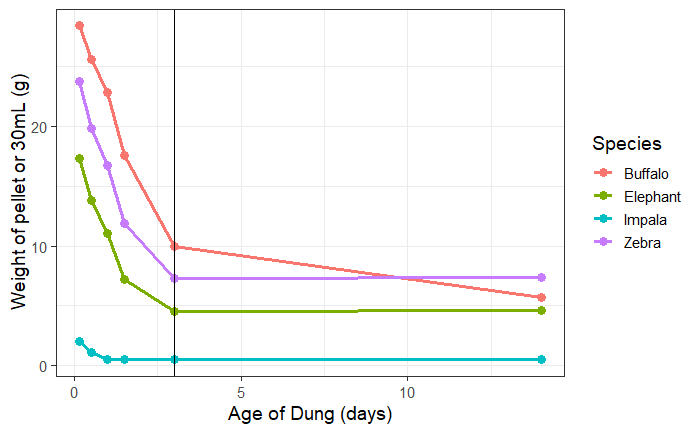


Fig. S3. Dung drying observations

Weight of dung pellets or 30 mL dung samples over time.


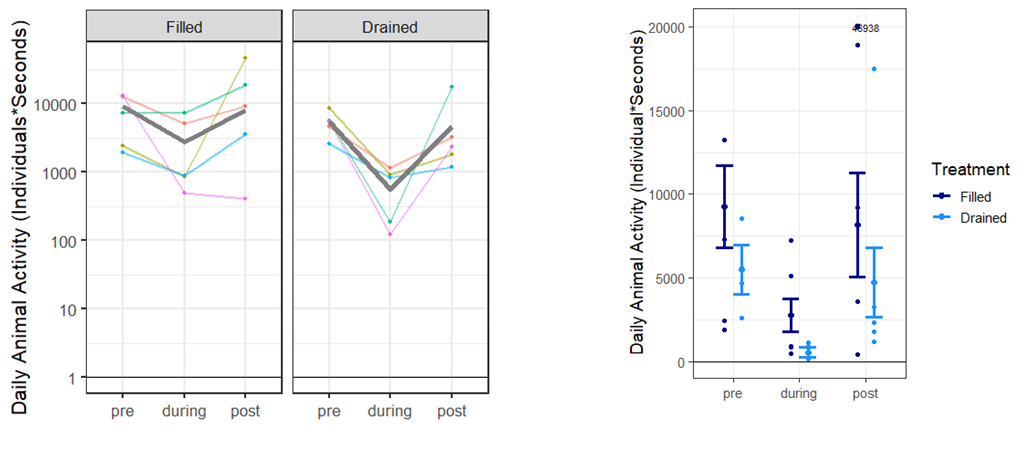


Fig. S4. Daily Animal Activity

Average daily animal activity (all species combined) measured by camera traps at each location throughout the experiment. Individual sites are shown in color, while the average across sites is shown in gray. Note that the plot is visualized on the log10 scale.


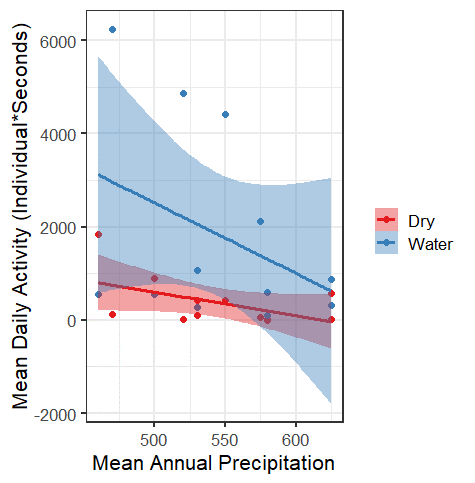


Fig. S5. Activity Across a Rainfall Gradient

Mean daily activity (points) for all herbivores summed together at 12 sites across Mpala Research Centre (measured by camera traps). While there was no significant interaction between MAP and water presence for any species, activity was substantially higher at water sources relative to dry sites. Bands show linear trends and standard errors.

Fig. S6. Parasite Density Near Water

Average estimated parasite density contributed by each focal species as a function of outward distance (along transects radiating from the center of sampling sites) at water sources and paired dry sites at Mpala. Elephants contribute the vast majority of total parasites.


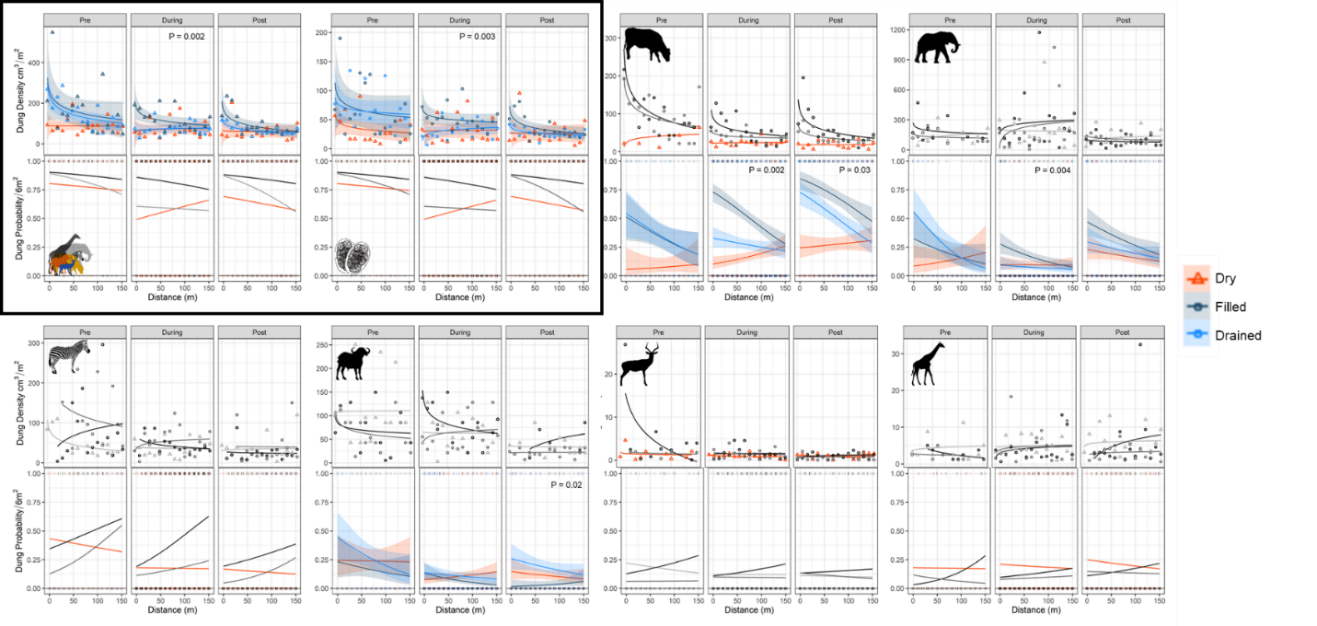


Fig. S7. Host-specific Dung and Parasite Density Experimental Results

Dung/parasite density and probabilities at filled pans, experimental pans, and dry sites throughout the experiment (pre-draining, during experiment, and post-refilling). When there was a significant interaction between status and treatment, best fit lines are shaded in color with standard error bands. When filled water sources differed from dry sites, lines are shaded in black/orange.


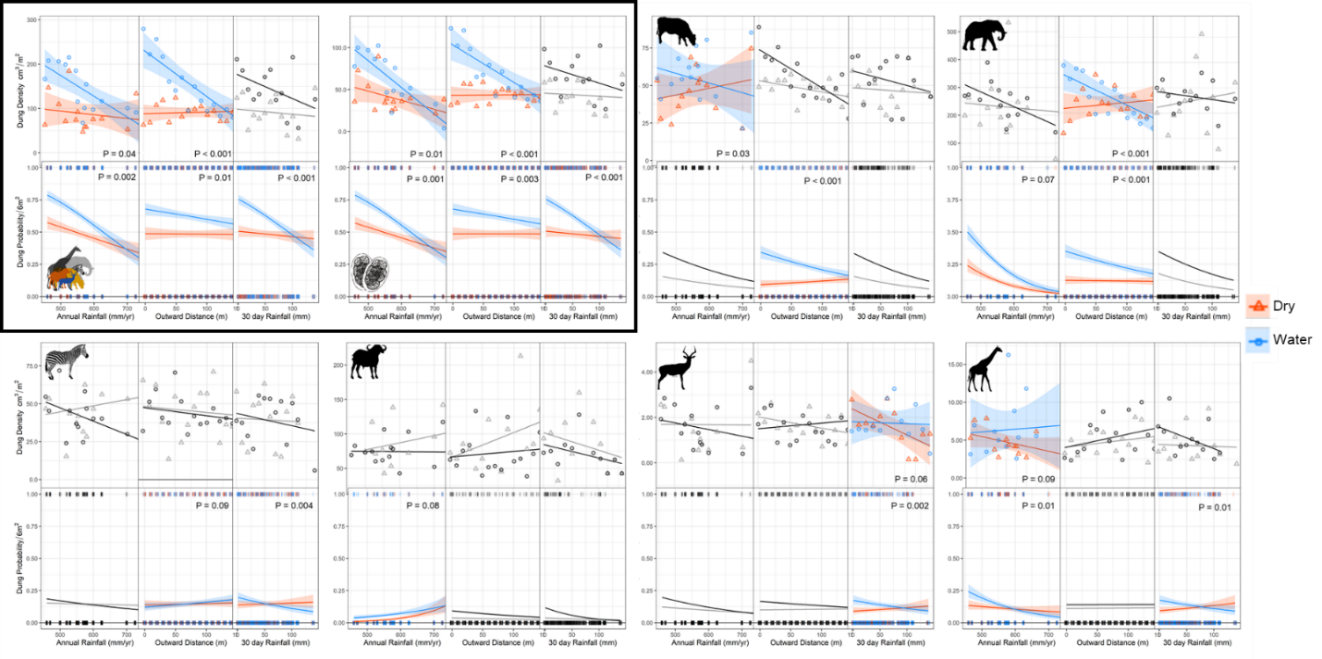


Fig. S8. Host-specific Dung and Parasite Density Observational Results

Dung/parasite density and probabilities at water sources and dry sites across different rainfall contexts and outward distance from water. When there was a significant interaction between site type (water/dry) and each covariate, best fit lines are shaded in color with standard error bands.


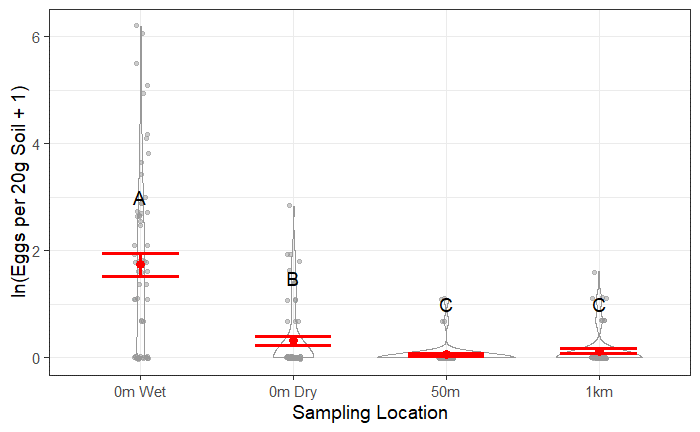


Fig. S9. Parasite Density in Soils

Parasite density at observational sites (Mpala) was substantially elevated in wet soils compared to dry sites. Density in dry soils next to water was also higher, but to a much lesser extent. Letters denote statistically significant groups after false-discovery-rate correction for multiple testing. Error bars show mean ± SE.

Table S1. Pathological Effects of Nematodes

General pathological effects (for livestock, as listed in the Merck veterinary manual (4, 5)) of parasitic nematode groups detectable in fecal egg counts and referenced in Table S2.

| **Parasite type** | **Order** | **Super Family** | **Family/ies** | **General pathology** |
| --- | --- | --- | --- | --- |
| Bowel Worm (BW) | Strongylida | Strongyloidea | Chabertiidae | Colon damage, diarrhea, hemorrhages with heavy infection |
| Cyathostomin (CY) | Strongylida | Strongyloidea | Strongylidae, Cyathostominae (sub) | Larvae damage intestines, reduce metabolism, and can cause colic and death in equids; milder effects in elephants |
| Large strongyle (LS) | Strongylida | Strongyloidea | Strongylidae, Strongylinae (sub) | Larvae circulate throughout the body causing variable damage, anemia, and potential ulceration in equids |
| Nodular worm (NW) | Strongylida | Strongyloidea | Oesophagostomum | Larvae penetrate intestinal walls and form nodules |
| Hookworm  (HW) | Strongylida | Ancyclostomatoidea | Ancyclostomatidae | Suck host blood and can cause anemia with heavy infections |
| Thin-necked worm (TN) | Stronglyida | Molineoidea | Molineidae | Diarrhea and anorexia |
| Trichostrongyloid (TR) | Strongylida | Trichostrongyloidea | Cooperiidae  Dictyocaulidae  Haemonchidae  Trichostrongylidae | Larvae bury into the intestinal lining, causing damage and nutritional losses to varying degrees |
| Threadworm  (TH) | Rhabditida | Tylenchina | Strongyloididae | Diarrhea and weight loss in calves, mild effects in sheep and goats |

Table S2. Host and Nematode Checklist

Nematodes detectable from fecal egg counts, compiled using data from the Global Mammal Parasite Database (GMPD)(1), the London Museum of Natural History (2), and additional parasite checklists (3). Numbers refer to total parasite records for each host (C – cattle, E – elephant, PZ – plains zebra, GZ – Grevy’s zebra, B – Buffalo, I – impala, and G – giraffe) and parasite species. Parasites of economic concern are shown in bold with additional notes, and those that have been found in rare human infections are bordered by a solid line.

| **Parasite Species** | **C** | **E** | **PZ** | **GZ** | **B** | **I** | **G** | **Type** | **Note** | **Citation** |
| --- | --- | --- | --- | --- | --- | --- | --- | --- | --- | --- |
| ***Haemonchus contortus*** | 43 |  |  |  | 4 | 8 | 2 | TR | Anemia, edema, death for sheep and goats | (10, 11) |
| ***Cooperia pectinata*** | 15 |  |  |  | 2 | 1 | 1 | TR | Weight loss, damage to small intestine, diarrhea | (12) |
| ***Cooperia punctata*** | 40 |  |  |  | 2 |  | 1 | TR | Weight loss, diarrhea, emaciation | (13) |
| ***Cooperia oncophora*** | 79 |  |  |  |  |  | 1 | TR | Mild effects; weight loss with high infections | (14) |
| ***Trichostrongylus axei*** | 41 |  |  |  |  | 1 |  | TR | Weight loss, diarrhea, lethargy, death in severe infections | (15, 16) |
| ***Strongyloides papillosus*** | 25 |  |  |  |  | 5 |  | TH | Weight loss, lethargy, death in sheep, goats, and cattle | (17) |
| ***Trichostrongylus colubriformis*** | 12 |  |  |  |  | 6 |  | TR | Mild effects; diarrhea, weight loss, anemia | (18, 19) |
| ***Bunostomum trigonocephalum*** | 4 |  |  |  |  | 1 |  | HW | Mild effects; gastroenteritis for small ruminants | (20) |
| ***Oesophagostomum columbianum*** | 3 |  |  |  |  | 2 |  | NW | Damage to gut in sheep and goats | (21) |
| ***Strongylus vulgaris*** |  |  | 12 | 1 |  |  |  | LS | Anorexia, colic, hemorrhage, death, severe in foals | (22) |
| ***Triodontophorus tenuicollis*** |  |  | 2 | 1 |  |  |  | LS | Damage to colon, ulceration | (23) |
| ***Gaigeria pachyscelis*** |  |  |  |  | 1 | 6 |  | HW | Anemia, death for sheep and goats | (24) |
| ***Ostertagia ostertagi*** | 114 |  |  |  |  |  |  | TR | Diarrhea, anorexia, death (calves) | (11, 25) |
| ***Haemonchus placei*** | 72 |  |  |  |  |  |  | TR | Similar effects as *H. contortous*; edema in calves | (26) |
| ***Oesophagostomum radiatum*** | 51 |  |  |  |  |  |  | NW | Anorexia, weight loss, death with very heavy infections | (27) |
| ***Bunostomum phlebotomum*** | 30 |  |  |  |  |  |  | HW | Anemia, weakness in sheep and cattle | (28) |
| ***Nematodirus helvetianus*** | 24 |  |  |  |  |  |  | TW | Reduced weight gain, fever in cattle | (29) |
| ***Mecistocirrus digitatus*** | 17 |  |  |  |  |  |  | TR | Anemia, reduced weight gain in calves | (30) |
| ***Teladorsagia circumcincta*** | 12 |  |  |  |  |  |  | TR | Reduced growth, appetite loss in sheep and lambs | (31, 32) |
| ***Chabertia ovina*** | 8 |  |  |  |  |  |  | BW | Weight loss (sheep and goats) | (33) |
| ***Nematodirus spathiger*** | 7 |  |  |  |  |  |  | TW | Anorexia, weight loss, diarrhea in sheep | (34) |
| ***Trichostrongylus vitrinus*** | 5 |  |  |  |  |  |  | TR | Gastrointestinal lesions in sheep | (16, 35) |
| *Cooperia curticei* | 5 |  |  |  |  | 1 |  | TR |  |  |
| *Cooperioides hamiltoni* | 2 |  |  |  |  | 11 |  | TR |  |  |
| *Impalaia nudicollis* | 1 |  |  |  |  | 4 |  | TR |  |  |
| *Camelostrongylus mentulatus* | 1 |  |  |  |  |  | 1 | TR |  |  |
| *Strongylus edentatus* |  | 1 | 5 |  |  |  |  | LS |  |  |
| *Cylicocyclus gyalocephaloides* |  | 1 | 1 |  |  |  |  | CY |  |  |
| *Oesophagostomum mwanzae* |  | 1 | 1 |  |  |  |  | NW |  |  |
| *Strongylus asini* |  |  | 9 | 1 |  |  |  | LS |  |  |
| *Cylindropharynx ornata* |  |  | 3 | 1 |  |  |  | CY |  |  |
| *Haemonchus bedfordi* |  |  |  |  | 5 | 4 |  | TR |  |  |
| *Cooperia fuelleborni* |  |  |  |  | 2 | 4 |  | TR |  |  |
| *Impalaia tuberculata* |  |  |  |  | 1 | 10 |  | TR |  |  |
| *Cooperia hungi* |  |  |  |  | 1 | 4 |  | TR |  |  |
| *Agriostomum gorgonis* |  |  |  |  | 1 | 2 |  | HW |  |  |
| *Haemonchus mitchelli* |  |  |  |  |  | 1 | 2 | TR |  |  |
| *Haemonchus similis* | 29 |  |  |  |  |  |  | TR |  |  |
| *Ostertagia lyrata* | 17 |  |  |  |  |  |  | TR |  |  |
| *Ostertagia leptospicularis* | 11 |  |  |  |  |  |  | TR |  |  |
| *Trichostrongylus longispicularis* | 8 |  |  |  |  |  |  | TR |  |  |
| *Nematodirus filicollis* | 6 |  |  |  |  |  |  | TW |  |  |
| *Ostertagia kolchida* | 6 |  |  |  |  |  |  | TR |  |  |
| *Agriostomum vryburgi* | 5 |  |  |  |  |  |  | HW |  |  |
| *Oesophagostomum venulosum* | 5 |  |  |  |  |  |  | NW |  |  |
| *Ostertagia bisonis* | 5 |  |  |  |  |  |  | TR |  |  |
| *Ostertagia trifurcata* | 5 |  |  |  |  |  |  | TR |  |  |
| *Marshallagia marshalli* | 4 |  |  |  |  |  |  | TR |  |  |
| *Nematodirus oiratianus* | 4 |  |  |  |  |  |  | TW |  |  |
| *Nematodirus abnormalis* | 2 |  |  |  |  |  |  | TW |  |  |
| *Nematodirus battus* | 2 |  |  |  |  |  |  | TW |  |  |
| *Orloffia orloffi* | 2 |  |  |  |  |  |  | TR |  |  |
| *Cooperia aserbaidjanica* | 1 |  |  |  |  |  |  | TR |  |  |
| *Cooperia sarnabada* | 1 |  |  |  |  |  |  | TR |  |  |
| *Haemonchus longistipes* | 1 |  |  |  |  |  |  | TR |  |  |
| *Hyostrongylus rubidus* | 1 |  |  |  |  |  |  | TR |  |  |
| *Marshallagia mongolica* | 1 |  |  |  |  |  |  | TR |  |  |
| *Marshallagia occidentalis* | 1 |  |  |  |  |  |  | TR |  |  |
| *Nematodirella longissimespiculata* | 1 |  |  |  |  |  |  | TR |  |  |
| *Orloffia dahurica* | 1 |  |  |  |  |  |  | TR |  |  |
| *Orloffia kasakhstanica* | 1 |  |  |  |  |  |  | TR |  |  |
| *Ostertagia buriatica* | 1 |  |  |  |  |  |  | TR |  |  |
| *Ostertagia crimensis* | 1 |  |  |  |  |  |  | TR |  |  |
| *Ostertagia gruehneri* | 1 |  |  |  |  |  |  | TR |  |  |
| *Ostertagia lasensis* | 1 |  |  |  |  |  |  | TR |  |  |
| *Spiculopteragia schulzi* | 1 |  |  |  |  |  |  | TR |  |  |
| *Trichostrongylus extenuatus* | 1 |  |  |  |  |  |  | TR |  |  |
| *Grammocephalus clathratus* |  | 12 |  |  |  |  |  | HW |  |  |
| *Murshidia linstowi* |  | 8 |  |  |  |  |  | CY |  |  |
| *Quilonia africana* |  | 8 |  |  |  |  |  | CY |  |  |
| *Quilonia uganda* |  | 8 |  |  |  |  |  | CY |  |  |
| *Murshidia africana* |  | 7 |  |  |  |  |  | CY |  |  |
| *Murshidia longicaudata* |  | 6 |  |  |  |  |  | CY |  |  |
| *Quilonia apiensis* |  | 6 |  |  |  |  |  | CY |  |  |
| *Khalilia sameera* |  | 5 |  |  |  |  |  | CY |  |  |
| *Murshidia memphisia* |  | 5 |  |  |  |  |  | CY |  |  |
| *Murshidia anisa* |  | 4 |  |  |  |  |  | CY |  |  |
| *Murshidia aziza* |  | 4 |  |  |  |  |  | CY |  |  |
| *Murshidia dawoodi* |  | 3 |  |  |  |  |  | CY |  |  |
| *Quilonia ethiopica* |  | 3 |  |  |  |  |  | CY |  |  |
| *Quilonia loxodontae* |  | 3 |  |  |  |  |  | CY |  |  |
| *Quilonia magna* |  | 3 |  |  |  |  |  | CY |  |  |
| *Bunostomum brevispiculum* |  | 2 |  |  |  |  |  | HW |  |  |
| *Bunostomum hamatum* |  | 2 |  |  |  |  |  | HW |  |  |
| *Murshidia brachyscelis* |  | 2 |  |  |  |  |  | CY |  |  |
| *Murshidia brevicapsulatus* |  | 2 |  |  |  |  |  | CY |  |  |
| *Murshidia omoensis* |  | 2 |  |  |  |  |  | CY |  |  |
| *Murshidia soudanensis* |  | 2 |  |  |  |  |  | CY |  |  |
| *Quilonia brevicauda* |  | 2 |  |  |  |  |  | CY |  |  |
| *Quilonia khalili* |  | 2 |  |  |  |  |  | CY |  |  |
| *Murshidia neveulemairei* |  | 1 |  |  |  |  |  | CY |  |  |
| *Murshidia witenbergi* |  | 1 |  |  |  |  |  | CY |  |  |
| *Oesophagostomum simpsoni* |  | 1 |  |  |  |  |  | NW |  |  |
| *Oesophagostomum yorkei* |  | 1 |  |  |  |  |  | NW |  |  |
| *Quilonia crenelata* |  | 1 |  |  |  |  |  | CY |  |  |
| *Quilonia spiculodentata* |  | 1 |  |  |  |  |  | CY |  |  |
| *Cylicocyclus insigne* |  |  | 6 |  |  |  |  | CY |  |  |
| *Cylicocyclus triramosus* |  |  | 6 |  |  |  |  | CY |  |  |
| *Triodontophorus serratus* |  |  | 5 |  |  |  |  | LS |  |  |
| *Craterostomum acuticaudatum* |  |  | 4 |  |  |  |  | CY |  |  |
| *Cyathostomum montgomeryi* |  |  | 4 |  |  |  |  | CY |  |  |
| *Poteriostomum imparidentatum* |  |  | 4 |  |  |  |  | CY |  |  |
| *Cylicocyclus adersi* |  |  | 3 |  |  |  |  | CY |  |  |
| *Cylicocyclus goldi* |  |  | 3 |  |  |  |  | CY |  |  |
| *Cylicostephanus minutus* |  |  | 3 |  |  |  |  | CY |  |  |
| *Cylindropharynx brevicauda* |  |  | 3 |  |  |  |  | CY |  |  |
| *Cylindropharynx longicauda* |  |  | 3 |  |  |  |  | CY |  |  |
| *Oesophagodontus robustus* |  |  | 3 |  |  |  |  | LS |  |  |
| *Poteriostomum ratzii* |  |  | 3 |  |  |  |  | CY |  |  |
| *Strongylus equinus* |  |  | 3 |  |  |  |  | LS |  |  |
| *Strongylus tetracanthus* |  |  | 3 |  |  |  |  | LS |  |  |
| *Cyathostomum alveatum* |  |  | 2 |  |  |  |  | CY |  |  |
| *Cylicocyclus auriculatus* |  |  | 2 |  |  |  |  | CY |  |  |
| *Cylicocyclus elongatus* |  |  | 2 |  |  |  |  | CY |  |  |
| *Cylicostephanus longibursatus* |  |  | 2 |  |  |  |  | CY |  |  |
| *Cylindropharynx intermedia* |  |  | 2 |  |  |  |  | CY |  |  |
| *Triodontophorus burchelli* |  |  | 2 |  |  |  |  | LS |  |  |
| *Coronocyclus coronatus* |  |  | 1 |  |  |  |  | CY |  |  |
| *Coronocyclus labiatus* |  |  | 1 |  |  |  |  | CY |  |  |
| *Cylicocyclus leptostomum* |  |  | 1 |  |  |  |  | CY |  |  |
| *Cylicocyclus radiatus* |  |  | 1 |  |  |  |  | CY |  |  |
| *Cylicocyclus ultrajectinus* |  |  | 1 |  |  |  |  | CY |  |  |
| *Cylicodontophorus reineckei* |  |  | 1 |  |  |  |  | CY |  |  |
| *Cylicodontophorus schurmanni* |  |  | 1 |  |  |  |  | CY |  |  |
| *Cylicostephanus calicatus* |  |  | 1 |  |  |  |  | CY |  |  |
| *Cylicostephanus caragandicus* |  |  | 1 |  |  |  |  | CY |  |  |
| *Cylicostephanus longiconus* |  |  | 1 |  |  |  |  | CY |  |  |
| *Cylindropharynx dollfusi* |  |  | 1 |  |  |  |  | CY |  |  |
| *Gyalocephalus capitatus* |  |  | 1 |  |  |  |  | CY |  |  |
| *Triodontophorus brevicauda* |  |  | 1 |  |  |  |  | LS |  |  |
| *Ashworthius lerouxi* |  |  |  |  | 2 |  |  | TR |  |  |
| *Cooperioides hepaticae* |  |  |  |  |  | 7 |  | TR |  |  |
| *Trichostrongylus thomasi* |  |  |  |  |  | 7 |  | TR |  |  |
| *Cooperia yoshidai* |  |  |  |  |  | 3 |  | TR |  |  |
| *Haemonchus krugeri* |  |  |  |  |  | 3 |  | TR |  |  |
| *Trichostrongylus falculatus* |  |  |  |  |  | 3 |  | TR |  |  |
| *Cooperia neitzi* |  |  |  |  |  | 1 |  | TR |  |  |
| *Cooperia rotundispiculum* |  |  |  |  |  | 1 |  | TR |  |  |
| *Haemonchus lawrencei* |  |  |  |  |  | 1 |  | TR |  |  |
| *Haemonchus vegliai* |  |  |  |  |  | 1 |  | TR |  |  |
| *Oesophagostomum walkeri* |  |  |  |  |  | 1 |  | NW |  |  |
| *Trichostrongylus angistris* |  |  |  |  |  | 1 |  | TR |  |  |
| *Trichostrongylus deflexus* |  |  |  |  |  | 1 |  | TR |  |  |
| *Trichostrongylus instabilis* |  |  |  |  |  | 1 |  | TR |  |  |
| *Monodontella giraffe* |  |  |  |  |  |  | 6 | HW |  |  |
| *Chabertiella pesteri* |  |  |  |  |  |  | 1 | CY |  |  |
| *Trichostrongylus probolurus* |  |  |  |  |  |  | 1 | TR |  |  |
|  |  |  |  |  |  |  |  |  |  |  |
| Unidentified Species | C | E | PZ | GZ | B | I | G | Type |  |  |
| *Strongyloides sp.* | 15 |  | 1 | 1 |  | 2 | 2 | TH |  |  |
| *Strongylus sp.* |  |  | 3 | 1 |  | 2 | 2 | LS |  |  |
| *Haemonchus sp.* | 18 |  |  |  | 1 | 1 |  | TR |  |  |
| *Oesophagostomum sp.* | 15 |  |  |  | 1 | 2 |  | NW |  |  |
| *Bunostomum sp.* | 11 |  |  |  | 1 | 1 |  | HW |  |  |
| *Cooperia sp.* | 24 |  |  |  |  | 1 |  | TR |  |  |
| *Trichostrongylus sp.* | 21 |  |  |  |  | 2 |  | TR |  |  |
| *Ostertagia sp.* | 19 |  |  |  |  | 2 |  | TR |  |  |
| *Triodontophorus sp.* |  |  | 1 | 1 |  |  |  | LS |  |  |
| *Nematodirus sp.* | 16 |  |  |  |  |  |  | TW |  |  |
| *Mecistocirrus sp.* | 2 |  |  |  |  |  |  | TR |  |  |
| *Chabertia sp.* | 1 |  |  |  |  |  |  | BW |  |  |
| *Marshallagia sp.* | 1 |  |  |  |  |  |  | TR |  |  |
| *Murshidia sp.* |  | 6 |  |  |  |  |  | CY |  |  |
| *Khalilia sp.* |  | 1 |  |  |  |  |  | CY |  |  |
| *Quilonia sp.* |  | 1 |  |  |  |  |  | CY |  |  |
| *Cylindropharynx sp.* |  |  | 2 |  |  |  |  | CY |  |  |
| *Cooperioides sp.* |  |  |  |  |  | 1 |  | TR |  |  |
| *Impalaia sp.* |  |  |  |  |  | 1 |  | TR |  |  |

Table S3. Experimental System Camera Deployments

Summary of experimental system camera trap deployments at Ol Pejeta Conservancy used to assess herbivore activity during dry season months.

| **Status** | **Site Name** | **Treatment** | **Start** | **End** | **Trap Nights** | **Camera Model** |
| --- | --- | --- | --- | --- | --- | --- |
| Pre | Jericho | Filled | 10/18/2016 | 10/31/2016 | 13 | Moultrie M-880 |
| Drained | 8/13/2016 | 8/27/2016 | 14 | Moultrie M-880 |
| Kambi | Filled | 9/30/2016 | 10/14/2016 | 14 | Moultrie M-880 |
| Drained | 9/24/2016 | 10/14/2016 | 20 | Moultrie M-880 |
| Oscar | Filled | 10/18/2016 | 11/2/2016 | 15 | Moultrie M-880 |
| Drained | 9/30/2016 | 10/18/2016 | 18 | Moultrie M-880 |
| Sidai | Filled | 9/30/2016 | 10/18/2016 | 18 | Moultrie M-880 |
| Drained | 9/30/2016 | 10/18/2016 | 18 | Moultrie M-880 |
| Tangi | Filled | 11/25/2016 | 11/30/2016 | 6 | Moultrie M-880 |
| Drained | 10/18/2016 | 11/2/2016 | 15 | Moultrie M-880 |
| During | Jericho | Filled | 7/10/2017 | 7/25/2017 | 15 | Moultrie M-880 |
| Drained | 7/10/2017 | 7/25/2017 | 15 | Moultrie M-880 |
| Kambi | Filled | 9/22/2017 | 10/25/2017 | 33 | Moultrie M-880 |
| Drained | 7/11/2017 | 7/18/2017 | 7  10 | Moultrie M-880 |
| 9/6/2017 | 9/16/2017 | Moultrie M-880 |
| Oscar | Filled | 7/25/2017 | 8/26/2017 | 32 | Moultrie M-880 |
| Drained | 7/25/2017 | 9/6/2017 | 43 | Moultrie M-880 |
| Sidai | Filled | 5/30/2017 | 6/30/2017 | 31 | Moultrie M-880 |
| Drained | 6/15/2017 | 7/14/2017 | 29 | Moultrie M-880 |
| Tangi | Filled | 6/15/2017 | 7/12/2017 | 27 | Moultrie M-880 |
| Drained | 6/15/2017 | 6/24/2017 | 9  5 | Moultrie M-880 |
| 7/25/2017 | 7/30/2017 | Moultrie M-880 |
| Post | Jericho | Filled | 6/18/2018 | 7/5/2018 | 17 | Moultrie M-880 |
| Drained | 5/31/2018 | 6/12/2018 | 12 | Moultrie M-880 |
| Kambi | Filled | 6/29/2018 | 7/5/2018 | 6 | Moultrie M-880 |
| Drained | 5/15/2018 | 6/15/2018 | 31 | Moultrie M-880 |
| Oscar | Filled | 8/23/2018 | 9/14/2018 | 22 | Moultrie M-880 |
| Drained | 8/5/2018 | 8/24/2018 | 19 | Moultrie A-30 |
| Sidai | Filled | 5/30/2018 | 7/4/2018 | 35 | Moultrie A-30 |
| Drained | 5/15/2018 | 5/18/2018 | 3  4  9 | Moultrie A-30 |
| 5/30/2018 | 6/3/2018 | Moultrie A-30 |
| 6/30/2018 | 7/9/2018 | Moultrie M-880 |
| Tangi | Filled | 7/4/2018 | 8/20/2018 | 47 | Moultrie M-880 |
| Drained | 5/14/2018 | 5/29/2018 | 15 | Moultrie A-30 |

Table S4. Observational System Camera Deployments

Summary of observational system camera trap deployments at Mpala Research Centre used to assess herbivore activity across a rainfall gradient.

| **Water/ Dry** | **Site** | **Camera Model** | **Begin Date & Time** | **End Date & Time** | **Trap Nights** |
| --- | --- | --- | --- | --- | --- |
| Water | 1 | Reconyx HC500 Hyperfire | 4/27/2016 9:20 | 5/18/2016 9:39 | 21.01 |
| Dry | 1 | Reconyx HC500 Hyperfire | 4/27/2016 12:16 | 5/18/2016 10:02 | 20.91 |
| Water | 2 | Reconyx HC500 Hyperfire | 6/30/2016 16:10 | 7/19/2016 | 18.72 |
| Dry | 2 | Reconyx HC500 Hyperfire | 6/30/2016 16:27 | 7/19/2016 | 18.72 |
| Water | 5 | Reconyx HC500 Hyperfire | 8/9/2016 | 8/22/2016 | 12.90 |
| Dry | 5 | Reconyx HC500 Hyperfire | 8/9/2016 15:27 | 8/22/2016 12:52 | 12.89 |
| Water | 6 | Reconyx HC500 Hyperfire | 8/22/2016 | 8/30/2016 17:05 | 8.15 |
| Dry | 6 | Reconyx HC500 Hyperfire | 8/9/2016 | 8/22/2016 13:18 | 12.93 |
| Water | 7 | Reconyx HC500 Hyperfire | 6/7/2016 16:07 | 6/30/2016 15:05 | 22.96 |
| Dry | 7 | Reconyx HC500 Hyperfire | 6/7/2016 15:43 | 6/30/2016 14:56 | 22.97 |
| Water | 10 | Reconyx RM45 Rapidfire | 6/6/2016 11:40 | 6/16/2016 13:27 | 10.07 |
| Dry | 10 | Reconyx RM45 Rapidfire | 6/6/2016 12:00 | 6/27/2016 11:12 | 20.97 |
| Water | 12 | Moultrie MCG-M880 | 7/2/2016 9:56 | 7/19/2016 11:34 | 17.07 |
| Dry | 12 | ScoutGuard 860C | 4/4/2016 12:22 | 4/22/2016 8:27 | 17.84 |
| Water | 13 | Reconyx HC500 Hyperfire | 6/7/2016 12:48 | 6/30/2016 12:32 | 22.99 |
| Dry | 13 | Reconyx HC500 Hyperfire | 6/7/2016 12:27 | 6/30/2016 12:44 | 23.01 |
| Water | 14 | Moultrie MCG-M880 | 8/22/2016 | 8/30/2016 14:50 | 8.18 |
| Dry | 14 | Reconyx HC500 Hyperfire | 8/22/2016 | 8/30/2016 14:51 | 8.20 |
| Water | 15 | Reconyx HC500 Hyperfire | 4/26/2016 | 5/18/2016 11:49 | 21.90 |
| Dry | 15 | Reconyx HC500 Hyperfire | 4/26/2016 | 5/7/2016 14:36 | 11.03 |
| Water | 16 | Reconyx HC500 Hyperfire | 7/19/2016 13:10 | 8/9/2016 12:41 | 20.98 |
| Dry | 16 | Reconyx HC500 Hyperfire | 7/19/2016 13:37 | 8/9/2016 12:43 | 20.96 |
| Water | 17 | Reconyx HC500 Hyperfire | 6/30/2016 13:58 | 7/11/2016 23:01 | 11.38 |
| Dry | 17 | Reconyx HC500 Hyperfire | 7/1/2016 2:47 | 7/19/2016 12:14 | 18.39 |

Table S5. Dung Properties

Species-specific dung properties used to calculate parasite density

| Measurement | Elephant | Cow | Zebra | Buffalo | Impala | Giraffe |
| --- | --- | --- | --- | --- | --- | --- |
| Density  (g/cm3) | 0.58 | 0.95† | 0.79 | 0.95 | 1.66 | 1.66‡ |
| Pellet dimensions (cm) | 8 x 8 x 4 | 8 x 8 x 2 | 6 x 4 x 1.5 | 8 x 8 x 2 | 1.1 x 0.6 x 0.6 | 2.5 x 2.5 x 1.5 |
| Pellet volume  (cm3) | 256 | 128 | 36 | 128 | 0.396 | 9.375 |

†Density assumed to be similar to buffalo measurements

‡Density assumed to be similar to impala measurements

Table S6. Fecal Egg Counts

Fecal egg count data and references for focal species included in our study.

| **Species** | **N** | **Mean** | **Median** | **Uncertainty** | **Prevalence** | **Location** | **Note** | **Method** | **Ref** |
| --- | --- | --- | --- | --- | --- | --- | --- | --- | --- |
| Buffalo | 100 | 2.07 |  |  | 0.3 | South Africa | Wet | MM | (36) |
| Buffalo | 100 | 4.44 |  |  | 0.69 | South Africa | Dry | MM | (36) |
| Buffalo | 375 | 298 |  | 23 (SE) |  | South Africa | Early dry | MM | (37) |
| Buffalo | 375 | 409 |  | 29 (SE) |  | South Africa | Late dry | MM | (37) |
| Buffalo | 60 | 349 |  | 54 (SE) | 0.85 | Mpala |  | MM | (38) |
| Buffalo | 40 | 274 |  |  |  | Kenya | Dry | MM | (39) |
| Buffalo | 11 | 294 |  |  |  | Kenya | Normal | MM | (39) |
| Buffalo | 167 | 251 |  |  |  | South Africa | M; Fig | MM | (40) |
| Buffalo | 226 | 251 |  |  |  | South Africa | F; Fig | MM | (40) |
| Buffalo | 78 | 1000 |  |  |  | South Africa | Fig | MM | (41) |
| Buffalo | 448 | 800 |  |  |  | South Africa | Fig | MM | (41) |
| Buffalo | 129 | 400 |  |  |  | South Africa | Fig | MM | (41) |
| Buffalo | 208 | 300 |  |  |  | South Africa | Fig | MM | (41) |
| Buffalo | 100 | 300 |  |  |  | South Africa | Fig | MM | (41) |
| Buffalo | 103 | 94.5 |  | 173 (SD) |  | South Africa | Y, Positive only | MM | (42) |
| Buffalo | 283 | 120.6 |  | 143 (SD) |  | South Africa | A, Positive only | MM | (42) |
| Cattle | 18 | 246 |  |  |  | Ghana | F | MM | (43) |
| Cattle | 6 | 22 |  | 58 (SD) |  | Tanzania |  | NA | (44) |
| Cattle | 6 | 90 |  | 305 (SD) |  | Tanzania |  | NA | (44) |
| Cattle | 8 | 85 |  | 152 (SD) |  | Tanzania |  | NA | (44) |
| Cattle | 210 | 319 |  | 62 (SE) |  | Ethiopia |  | MM | (45) |
| Cattle | 98 | 48 |  |  | 0.14 | Kenya | Y | MM | (46) |
| Cattle | 321 | 18.4 |  |  | 0.14 | Kenya | A | MM | (46) |
| Cattle | 349 | 296 |  | 37.3 (SE) | 0.51 | Kenya |  | MM | (47) |
| Cattle | 46 | 80 |  |  |  | Tanzania | A; Fig | MM | (48) |
| Cattle | 46 | 150 |  |  |  | Tanzania | Y; Fig | MM | (48) |
| Cattle | 46 | 300 |  |  |  | Tanzania | J; Fig | MM | (48) |
| Cattle | 23 | 100 |  |  |  | Tanzania | A; Fig | MM | (48) |
| Cattle | 23 | 150 |  |  |  | Tanzania | Y; Fig | MM | (48) |
| Cattle | 23 | 200 |  |  |  | Tanzania | J; Fig | MM | (48) |
| Cattle | 32 | 125 |  |  |  | Tanzania | A; Fig | MM | (48) |
| Cattle | 31 | 200 |  |  |  | Tanzania | Y; Fig | MM | (48) |
| Cattle | 31 | 300 |  |  |  | Tanzania | J; Fig | MM | (48) |
| Cattle | 31 | 245 | 200 | 31 (SE) | 0.9 | Kenya | T | NaCl Float | (49) |
| Cattle | 423 | 180.4 |  |  | 0.55 | South Africa |  | MM | (50) |
| Cattle | 600 | 291 | 272 | 183 (SD) | 0.7 | Rwanda | Dry (15) | MM | (51) |
| Cattle | 600 | 246 | 248 | 178 (SD) | 0.63 | Rwanda | Wet (15) | MM | (51) |
| Cattle | 57 | 229 |  |  | 0.84 | Kenya | C; Fig | MM | (52) |
| Cattle | 56 | 325 |  |  | 0.93 | Kenya | Y; Fig | MM | (52) |
| Cattle | 52 | 159 |  |  | 0.75 | Kenya | A; Fig | MM | (52) |
| Cattle | 64 | 150 |  |  |  | Kenya | C | MM | (52) |
| Elephant | 187 | 1100 |  | 500 (SD) |  | Botswana |  | MM | (53) |
| Elephant | 241 | 500 |  | 600 (SD) |  | Botswana |  | MM | (53) |
| Elephant | 63 | 1409 | 1375 |  |  | Namibia |  | MM | (54) |
| Elephant | 63 | 2204 | 2138 |  |  | Namibia |  | MM | (54) |
| Elephant | 19 | 202 | 50 | 319 (SD) | 0.93 | Kenya | F | MM | (55) |
| Elephant | 7 | 121 | 50 | 236 (SD) | 0.93 | Kenya | M | MM | (55) |
| Elephant | 16 | 106 | 75 | 125 (SD) | 0.93 | Kenya | M | MM | (55) |
| Elephant | 35 | 320 | 200 | 419 (SD) | 0.93 | Kenya | F | MM | (55) |
| Elephant | 4 | 275 | 175 | 333 (SD) | 0.93 | Kenya | M | MM | (55) |
| Elephant | 14 | 171 | 50 | 272 (SD) | 0.93 | Kenya | M | MM | (55) |
| Elephant | 46 | 146 | 100 | 205 (SD) | 0.93 | Kenya | F | MM | (55) |
| Elephant | 8 | 200 | 100 | 276 (SD) | 0.93 | Kenya | M | MM | (55) |
| Elephant | 19 | 89 | 50 | 133 (SD) | 0.93 | Kenya | M | MM | (55) |
| Elephant | 25 | 36 | 0 | 67 (SD) | 0.93 | Kenya | F | MM | (55) |
| Elephant | 10 | 0 | 0 | 0 (SD) | 0.93 | Kenya | M | MM | (55) |
| Elephant | 22 | 23 | 0 | 46 (SD) | 0.93 | Kenya | M | MM | (55) |
| Elephant | 578 | 1694 |  | 61 (SE) | 0.96 | Kenya |  | MM | (56) |
| Elephant | 119 | 736 |  | 84 (SE) |  | Namibia | M | MM | (57) |
| Elephant | 70 | 976 |  | 134 (SE) |  | Namibia | F/J | MM | (57) |
| Giraffe | 21 | 77 |  |  | 0.33 | UK | Captive, treated | MM | (58) |
| Giraffe | 14 | 0 | 0 |  | 0.06 | Kenya | Est mean | MM | (59) |
| Impala | 692 | 963 |  | 39 (SE) | 0.96 | Mpala |  | MM | (38) |
| Impala | 442 | 660 |  |  |  | Kenya | Dry | MM | (39) |
| Impala | 225 | 467 |  |  |  | Kenya | Normal | MM | (39) |
| Impala | 112 | 55 |  |  |  | Zambia | Cool dry | MM | (60) |
| Impala | 112 | 39 |  |  |  | Zambia | Hot dry | MM | (60) |
| Impala | 112 | 264 |  |  |  | Zambia | Wet | MM | (60) |
| Impala | 102 | 216 |  | 18 (SE) |  | Uganda | Nat. Park | CF | (61) |
| Impala | 76 | 247 |  | 31 (SE) |  | Uganda | Ranched | CF | (61) |
| Zebra (G) | 39 | 569 | 500 | 60 (SE) | 0.82 | Kenya | T | NaCl Float | (49) |
| Zebra (G) | 15 | 1306 |  |  |  | Kenya | J | MM | (62) |
| Zebra (G) | 47 | 1187 |  |  |  | Kenya | J | MM | (62) |
| Zebra (G) | 145 | 1635 |  |  |  | Kenya | A | MM | (62) |
| Zebra (G) | 15 | 1100 |  | 300 (SE) |  | Kenya |  |  | (63) |
| Zebra (P) | 76 | 317.9 |  |  |  | Uganda | F | MM | (64) |
| Zebra (P) | 65 | 241.5 |  |  |  | Uganda | M | MM | (64) |
| Zebra (P) | 31 | 473 | 350 | 67 (SE) | 0.61 | Kenya | T | NaCl Float | (49) |
| Zebra (P) | 5 | 2500 | 2150 | 628 (SE) | 1 | Namibia |  | Krecek 1983 | (65) |
| Zebra (P) | 15 | 2100 |  | 300 (SE) |  | Kenya |  |  | (63) |
| Zebra (P) | 247 | 1600 |  | 250 (SE) |  | Namibia | J; Fig | MM | (66) |
| Zebra (P) | 247 | 2600 |  | 200 (SE) |  | Namibia | Y; Fig | MM | (66) |
| Zebra (P) | 247 | 2500 |  | 100 (SE) |  | Namibia | A; Fig | MM | (66) |
| Zebra (P) | 10 | 1225 |  | 104 (SE) | 0.8 | Kenya | Ranched | MM | (67) |
| Zebra (P) | 10 | 1620 |  | 204 (SE) | 1 | Kenya | Free Ranging | MM | (67) |
| Notes: J = Juvenile, Y = Yearling, A = Adult, F = Female, M = Male  Fig: Values estimated from figures, Tab: Values calculated from table  MM = McMaster (or modified) egg float method | | | | | | | | | |

Table S7. Experimental System Herbivore Activity GLMM Results

Coefficients (log-means), standard errors, and statistical results for best negative binomial GLMMs (one model per row) of herbivore total activity (T) grazing (leaf) and drinking (droplet) activity (daily individual * seconds) for the experimental system at Ol Pejeta Conservancy. Significant negative interactions between experiment status (pre, during, post) and treatment (filled, drained) indicate substantial decreases in these behaviors at experimental pans relative to filled pans after the first period of the experiment.

| Key: Est. ± SE  Z (P-value) | | (Intercept) | Drained | Pre | Post | During:  Drained | Post:  Drained | R2Cond  R2Mar | σ2  τ00 Location | Fam. |
| --- | --- | --- | --- | --- | --- | --- | --- | --- | --- | --- |
|  |  |  |  |  |  |  |  |  |  |  |
| All | T | 9.08 ± 0.34 | -0.49 ± 0.35 | -0.16 ± 0.28 | -0.25 ± 0.3 | -0.58 ± 0.36 | 0.91 ± 0.4 | 1.00 | 0.23 | NB |
| 26.64 (<0.001) | -1.41 (0.16) | -0.58 (0.56) | -0.83 (0.41) | -1.62 (0.10) | 2.27 (0.02) | 0.56 | 0.18 |
|  |  |  |  |  |  |  |  |  |  |
| 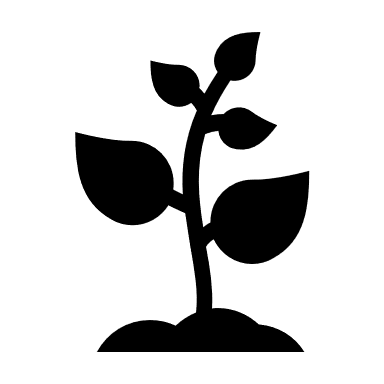 | 7.66 ± 0.29 | -0.43 ± 0.28 | -0.07 ± 0.22 | -0.02 ± 0.24 | -0.42 ± 0.29 | 0.81 ± 0.32 | 0.02 | 19.48 | T |
| 26.02 (<0.001) | -1.53 (0.13) | -0.33 (0.74) | -0.07 (0.94) | -1.47 (0.14) | 2.56 (0.01) | 0.01 | 0.16 |
|  |  |  |  |  |  |  |  |  |  |
| 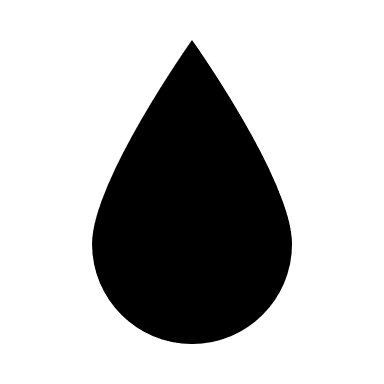 | 8.01 ± 0.35 | -0.64 ± 0.28 | -0.33 ± 0.22 | -0.35 ± 0.23 | -0.65 ± 0.28 | 1.41 ± 0.32 | 0.04 | 22.27 | T |
| 22.82 (<0.001) | -2.33 (0.02) | -1.52 (0.13) | -1.47 (0.14) | -2.27 (0.02) | 4.49 (<0.001) | 0.02 | 0.34 |
|  |  |  |  |  |  |  |  |  |  |  |
|  |  |  |  |  |  |  |  |  |  |  |
| Cattle | T | 8.02 ± 0.42 | -0.29 ± 0.47 | -0.02 ± 0.38 | 0.14 ± 0.4 | -1.09 ± 0.49 | 0.1 ± 0.55 | 0.01 | 61.85 | T |
| 19.11 (0) | -0.62 (0.53) | -0.05 (0.96) | 0.34 (0.73) | -2.23 (0.03) | 0.18 (0.86) | 0.01 | 0.11 |
|  |  |  |  |  |  |  |  |  |  |
| 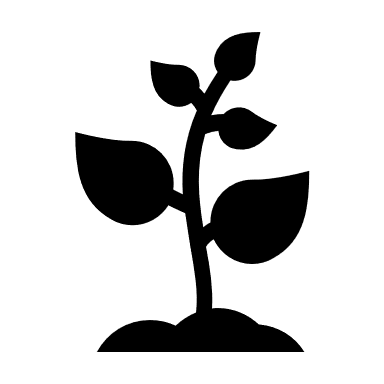 | 6.78 ± 0.45 | -0.24 ± 0.49 | 0.05 ± 0.39 | 0.17 ± 0.42 | -1.01 ± 0.5 | 0.18 ± 0.56 | 0.01 | 66.82 | T |
| 15.21 (0) | -0.49 (0.62) | 0.13 (0.9) | 0.42 (0.68) | -2 (0.05) | 0.32 (0.75) | 0.01 | 0.14 |
|  |  |  |  |  |  |  |  |  |  |
| 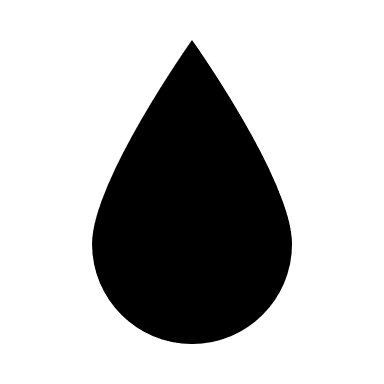 | 7.05 ± 0.45 | -0.37 ± 0.48 | -0.24 ± 0.39 | 0.13 ± 0.41 | -1.18 ± 0.5 | 0.54 ± 0.56 | 0.02 | 77.00 | T |
| 15.75 (0) | -0.77 (0.44) | -0.62 (0.54) | 0.31 (0.76) | -2.35 (0.02) | 0.97 (0.33) | 0.01 | 0.17 |
|  |  |  |  |  |  |  |  |  |  |  |
|  |  |  |  |  |  |  |  |  |  |  |
| Elephant | T | 6.66 ± 0.39 | 0.11 ± 0.4 | 0.03 ± 0.33 | -0.38 ± 0.36 | -1.68 ± 0.42 | 0.84 ± 0.45 | 0.02 | 36.63 | T |
| 17.02 (<0.001) | 0.28 (0.78) | 0.1 (0.92) | -1.06 (0.29) | -4.03 (<0.001) | 1.86 (0.06) | 0.02 | 0.20 |
|  |  |  |  |  |  |  |  |  |  |
| 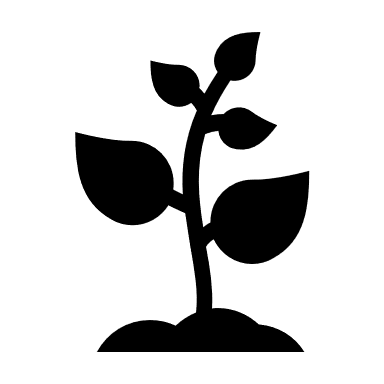 | 4.81 ± 0.45 | 0.24 ± 0.44 | 0.14 ± 0.37 | -0.01 ± 0.39 | -1.31 ± 0.45 | 1 ± 0.49 | 0.02 | 44.48 | T |
| 10.76 (<0.001) | 0.54 (0.59) | 0.39 (0.7) | -0.03 (0.97) | -2.88 (0.004) | 2.05 (0.04) | 0.01 | 0.32 |
|  |  |  |  |  |  |  |  |  |  |
| 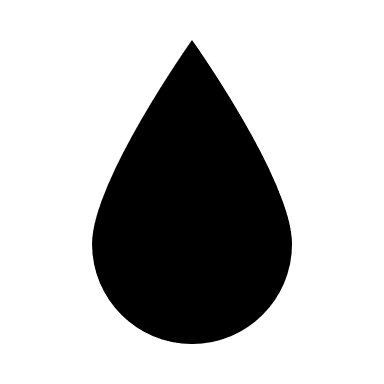 | 6.08 ± 0.44 | -0.13 ± 0.41 | -0.15 ± 0.34 | -1.00 ± 0.37 | -1.66 ± 0.43 | 1.67 ± 0.47 | 0.03 | 46.57 | T |
| 13.73 (<0.001) | -0.31 (0.76) | -0.43 (0.67) | -2.71 (0.01) | -3.85 (<0.001) | 3.57 (<0.001) | 0.02 | 0.41 |
|  |  |  |  |  |  |  |  |  |  |  |
|  |  |  |  |  |  |  |  |  |  |  |
| Zebra | T | 7.33 ± 0.55 | -1.32 ± 0.4 | -0.09 ± 0.32 | -0.94 ± 0.34 | 0.11 ± 0.41 | 1.01 ± 0.46 | 0.05 | 33.27 | T |
| 13.42 (<0.001) | -3.3 (<0.001) | -0.27 (0.79) | -2.73 (0.01) | 0.26 (0.80) | 2.19 (0.03) | 0.01 | 0.78 |
|  |  |  |  |  |  |  |  |  |  |
| 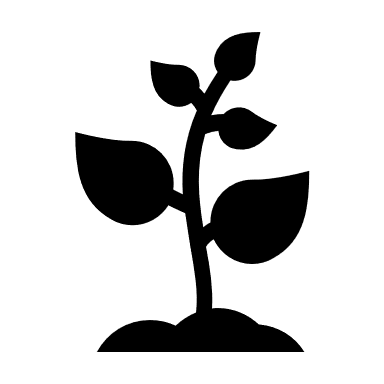 | 6.12 ± 0.51 | -1.08 ± 0.46 | -0.16 ± 0.37 | -0.64 ± 0.39 | 0.40 ± 0.47 | 0.89 ± 0.52 | 0.02 | 40.10 | T |
| 12.08 (<0.001) | -2.37 (0.02) | -0.43 (0.67) | -1.61 (0.11) | 0.85 (0.40) | 1.71 (0.09) | 0.00 | 0.47 |
|  |  |  |  |  |  |  |  |  |  |
| 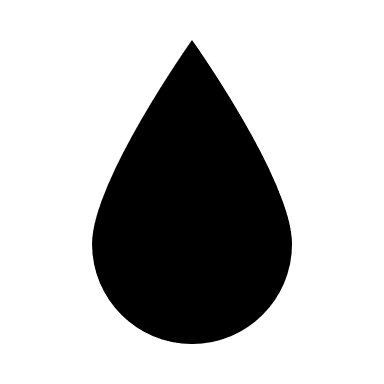 | 5.78 ± 0.67 | -1.22 ± 0.43 | -0.17 ± 0.34 | -1.05 ± 0.37 | -0.19 ± 0.44 | 1.28 ± 0.5 | 0.05 | 43.22 | T |
| 8.69 (<0.001) | -2.84 (0.005) | -0.49 (0.62) | -2.83 (0.005) | -0.44 (0.66) | 2.54 (0.01) | 0.01 | 1.38 |
|  |  |  |  |  |  |  |  |  |  |  |
|  |  |  |  |  |  |  |  |  |  |  |
| Buffalo | T | 5.92 ± 0.83 | -0.82 ± 0.8 | 0.65 ± 0.69 | 0.44 ± 0.74 | 0.07 ± 0.82 | 2.26 ± 0.92 | 1.00 | 0.04 | NB |
| 7.09 (<0.001) | -1.01 (0.31) | 0.94 (0.35) | 0.6 (0.55) | 0.09 (0.93) | 2.46 (0.01) | 0.18 | 0.92 |
|  |  |  |  |  |  |  |  |  |  |
| 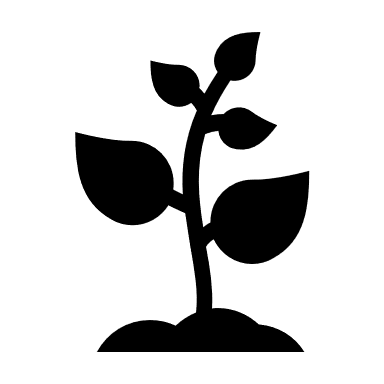 | 4.51 ± 0.71 | -0.70 ± 0.63 | 0.30 ± 0.52 | 0.42 ± 0.55 | 0.45 ± 0.65 | 2.03 ± 0.7 | 0.02 | 60.32 | T |
| 6.34 (<0.001) | -1.11 (0.27) | 0.58 (0.56) | 0.76 (0.45) | 0.7 (0.48) | 2.88 (0.004) | 0.00 | 1.13 |
|  |  |  |  |  |  |  |  |  |  |
| 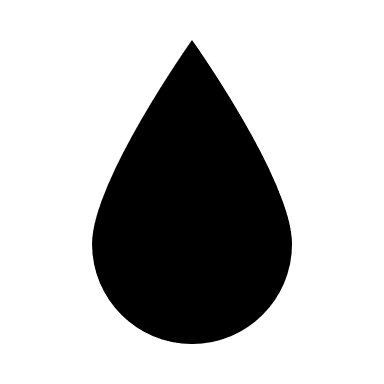 | 5.19 ± 0.72 | -1.33 ± 0.61 | -0.02 ± 0.49 | -0.11 ± 0.52 | 0.70 ± 0.63 | 2.92 ± 0.68 | 0.03 | 67.23 | T |
| 7.24 (<0.001) | -2.19 (0.03) | -0.05 (0.96) | -0.21 (0.84) | 1.12 (0.26) | 4.31 (<0.001) | 0.00 | 1.25 |
|  |  |  |  |  |  |  |  |  |  |  |
|  |  |  |  |  |  |  |  |  |  |  |
| Impala | T | 5.38 ± 0.93 | 0.36 ± 0.81 | 0.01 ± 0.67 | -0.04 ± 0.71 | -0.82 ± 0.82 | -0.55 ± 0.91 | 1.00 | 0.05 | NB |
| 5.8 (<0.001) | 0.44 (0.66) | 0.01 (0.99) | -0.05 (0.96) | -1 (0.32) | -0.61 (0.54) | 0.02 | 1.84 |
|  |  |  |  |  |  |  |  |  |  |
| 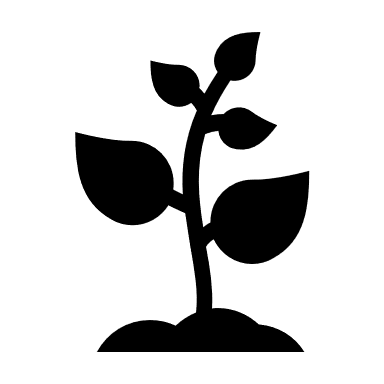 | 4.15 ± 0.8 | -0.61 ± 0.74 | -0.14 ± 0.59 | -0.11 ± 0.63 | 0.24 ± 0.75 | 0.41 ± 0.81 | 0.03 | 66.67 | T |
| 5.16 (<0.001) | -0.82 (0.41) | -0.24 (0.81) | -0.18 (0.86) | 0.32 (0.75) | 0.51 (0.61) | 0.00 | 1.31 |
|  |  |  |  |  |  |  |  |  |  |
| 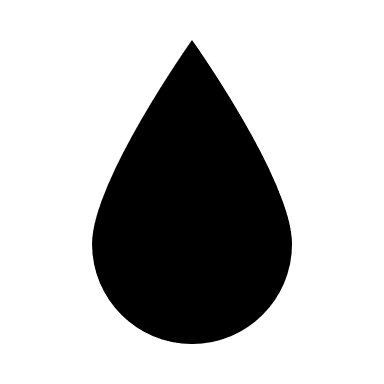 | 3.84 ± 0.9 | -0.40 ± 0.69 | -0.59 ± 0.56 | -1.03 ± 0.61 | -0.52 ± 0.71 | 0.41 ± 0.78 | 0.04 | 82.62 | T |
| 4.29 (<0.001) | -0.58 (0.56) | -1.06 (0.29) | -1.69 (0.09) | -0.73 (0.46) | 0.52 (0.60) | 0.00 | 2.19 |
|  |  |  |  |  |  |  |  |  |  |  |
|  |  |  |  |  |  |  |  |  |  |  |
| Giraffe | T | 5.08 ± 0.99 | 0.24 ± 1.07 | -0.53 ± 0.89 | -1.46 ± 0.95 | -0.70 ± 1.09 | 0.74 ± 1.23 | 1.00 | 0.02 | NB |
| 5.15 (<0.001) | 0.23 (0.82) | -0.6 (0.55) | -1.53 (0.12) | -0.64 (0.52) | 0.61 (0.54) | 0.11 | 0.86 |
|  |  |  |  |  |  |  |  |  |  |
| 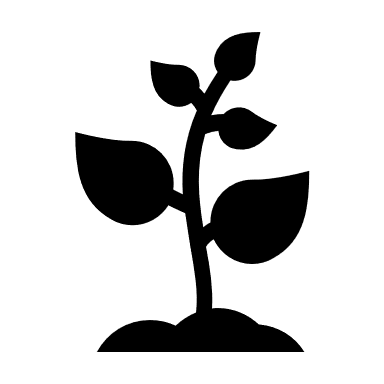 | 2.95 ± 0.79 | 0.12 ± 0.71 | -0.41 ± 0.62 | -1.15 ± 0.7 | -0.40 ± 0.73 | 1.07 ± 0.84 | 0.01 | 92.24 | T |
| 3.74 (<0.001) | 0.17 (0.86) | -0.66 (0.51) | -1.66 (0.1) | -0.55 (0.59) | 1.27 (0.20) | 0.00 | 1.20 |
|  |  |  |  |  |  |  |  |  |  |
| 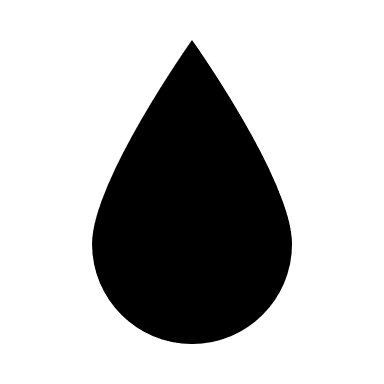 | 3.67 ± 0.81 | -0.53 ± 0.6 | -1.04 ± 0.51 | -1.71 ± 0.58 | -0.03 ± 0.63 | 1.40 ± 0.75 | 0.02 | 92.54 | T |
| 4.54 (<0.001) | -0.87 (0.38) | -2.07 (0.04) | -2.96 (0.003) | -0.05 (0.96) | 1.87 (0.06) | 0.00 | 1.92 |
|  |  |  |  |  |  |  |  |  |  |  |

Table S8. Observational System Herbivore Activity GLMM Results

Coefficients (log-means), standard errors, and statistical results for best Tweedie (Fam. = T) or negative binomial (Fam. = NB) GLMMs of herbivore total (T) or grazing (leaf) activity (daily individual*seconds) at observational water sources and dry sites at Mpala Research Centre.

| Key: Est. ± SE  Z (P-value) | | (Intercept)  Matrix, MAP=4.6 | Water | MAP | Water:MAP | R2Cond  R2Mar | σ2  τ00 Location | Fam. |
| --- | --- | --- | --- | --- | --- | --- | --- | --- |
|  |  |  |  |  |  |  |  |  |
| All | T | 4.55 ± 0.76 | 1.55 ± 0.4 | -0.01 ± 0.01 |  | 0.04 | 48.72 | T |
| 6.01 (<0.001) | 3.9 (<0.001) | -1.57 (0.12) |  | 0.02 | 1.05 |
|  |  |  |  |  |  |  |  |
| 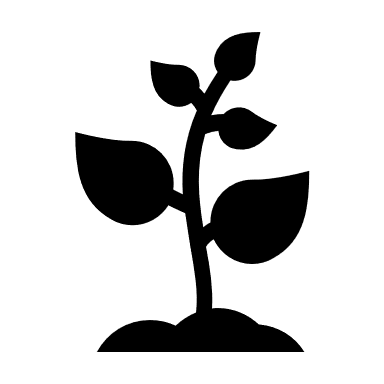 | 4.08 ± 0.78 | 0.98 ± 0.54 | -0.02 ± 0.01 |  | 0.02 | 90.22 | T |
| 5.25 (<0.001) | 1.82 (0.07) | -2.43 (0.02) |  | 0.01 | 0.78 |
|  |  |  |  |  |  |  |  |  |
|  |  |  |  |  |  |  |  |  |
| Cattle | T | 5.86 ± 1.25 | 0.78 ± 0.6 | -0.02 ± 0.01 |  | 0.03 | 152.15 | T |
| 4.69 (<0.001) | 1.31 (0.19) | -1.81 (0.07) |  | 0.01 | 2.50 |
|  |  |  |  |  |  |  |  |
| 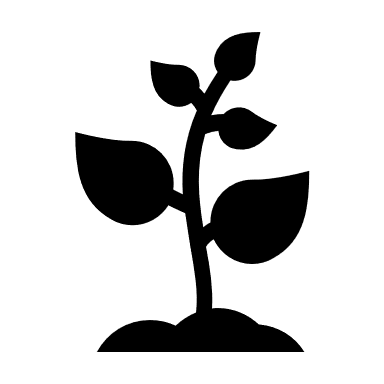 | 5.54 ± 1.12 | 0.45 ± 0.76 | -0.03 ± 0.01 |  | 0.02 | 173.23 | T |
| 4.93 (<0.001) | 0.6 (0.55) | -2.11 (0.03) |  | 0.01 | 1.10 |
|  |  |  |  |  |  |  |  |  |
|  |  |  |  |  |  |  |  |  |
| Elephant | T | 2.75 ± 1.62 | 1.43 ± 0.77 | -0.02 ± 0.02 | 0.02 ± 0.01 | 0.18 | 44.91 | T |
| 1.7 (0.09) | 1.87 (0.06) | -1.5 (0.13) | 2.59 (0.01) | 0.07 | 6.04 |
|  |  |  |  |  |  |  |  |
| 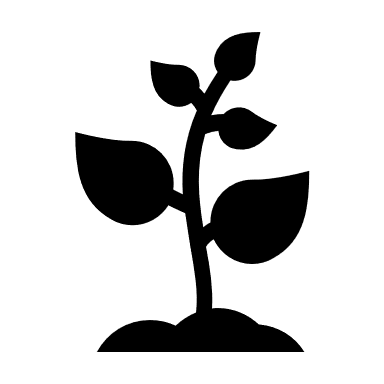 | 0.16 ± 1.4 | 2.54 ± 0.57 | -0.01 ± 0.01 |  | 0.10 | 55.70 | T |
| 0.12 (0.91) | 4.43 (<0.001) | -0.68 (0.5) |  | 0.03 | 4.03 |
|  |  |  |  |  |  |  |  |  |
|  |  |  |  |  |  |  |  |  |
| Zebra | T | 4.55 ± 0.76 | 1.55 ± 0.4 | -0.01 ± 0.01 |  | 0.04 | 48.72 | T |
| 6.01 (<0.001) | 3.9 (<0.001) | -1.57 (0.12) |  | 0.02 | 1.05 |
|  |  |  |  |  |  |  |  |
| 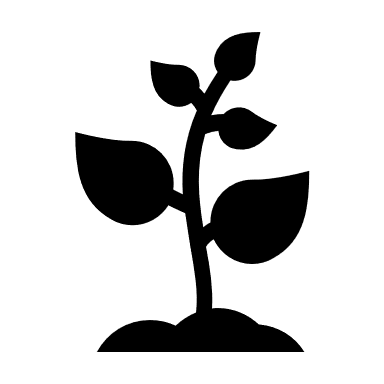 | 4.08 ± 0.78 | 0.98 ± 0.54 | -0.02 ± 0.01 |  | 0.02 | 90.22 | T |
| 5.25 (<0.001) | 1.82 (0.07) | -2.43 (0.02) |  | 0.01 | 0.78 |
|  |  |  |  |  |  |  |  |  |
|  |  |  |  |  |  |  |  |  |
| Buffalo | T | -1.08 ± 2.31 | 2.82 ± 0.79 | 0.00 ± 0.02 |  | 0.12 | 83.11 | T |
| -0.47 (0.64) | 3.58 (0.003) | 0.24 (0.81) |  | 0.02 | 8.85 |
|  |  |  |  |  |  |  |  |
| 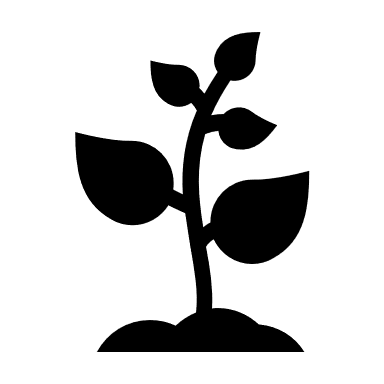 | -2.44 ± 3.75 | 2.49 ± 1.43 | 0.00 ± 0.02 |  | 0.05 | 198.72 | T |
| -0.65 (0.52) | 1.73 (0.08) | 0.00 (1.00) |  | 0.01 | 8.35 |
|  |  |  |  |  |  |  |  |  |
|  |  |  |  |  |  |  |  |  |
| Impala | T | 4.50 ± 1.48 | 0.62 ± 0.86 | -0.01 ± 0.01 |  | 1.00 | 0.03 | NB |
| 3.05 (0.002) | 0.72 (0.47) | -0.91 (0.36) |  | 0.11 | 4.36 |
|  |  |  |  |  |  |  |  |
| 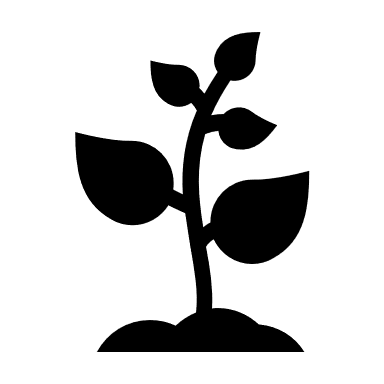 | 3.35 ± 1.12 | -0.51 ± 0.68 | -0.01 ± 0.01 |  | 0.02 | 109.55 | T |
| 2.98 (0.003) | -0.74 (0.46) | -0.76 (0.45) |  | 0.00 | 1.70 |
|  |  |  |  |  |  |  |  |  |
|  |  |  |  |  |  |  |  |  |
| Giraffe | T | 3.08 ± 1.06 | 1.86 ± 0.93 | -0.01 ± 0.01 |  |  | 0.01 | NB |
| 2.91 (0.004) | 2 (0.05) | -1.6 (0.11) |  | 1.00 | 0.00 |
|  |  |  |  |  |  |  |  |
| 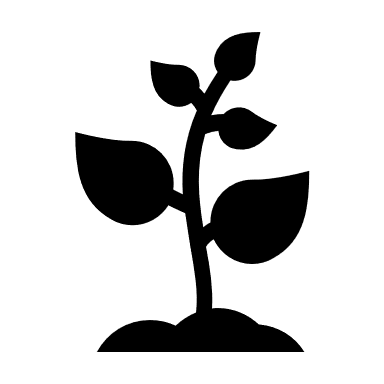 | 1.02 ± 1.2 | 0.34 ± 1.05 | 0.00 ± 0.01 |  |  | 187.74 | T |
| 0.85 (0.40) | 0.32 (0.75) | -0.43 (0.67) |  | 0.00 | 0.00 |
|  |  |  |  |  |  |  |  |  |

Table S9. Experimental System Log-Ratio LMM Results

Best models and coefficients for log ratios of dung and parasite densities at filled water pans versus experimental pans. Parameters indicating increased dung density at filled pans relative to drained pans are highlighted in green, while those indicating decreased density are highlighted in orange. Distance is scaled such that a single unit increase in distance corresponds with 100m outward from water. The intercept corresponds to 0m from water prior to conducting the experiment (“Pre”). Both 95% profile and bias-corrected bootstrap confidence intervals (from 10,000 bootstraps) are provided for each coefficient.

| **Species** | **Intercept**  **(0m, Pre)** | **During** | **Post** | **Distance** | **Distance:**  **During** | | **Distance:**  **Post** | **σ2**  **σ2site**  **σ2period** |
| --- | --- | --- | --- | --- | --- | --- | --- | --- |
| **All** | -0.15  -0.27  -1.23, 0.93  -1.21, 0.96  0.786 | 1.97  3.31  0.80, 3.14  0.74, 3.12  **0.002** | 0.73  1.16  -0.50, 1.96  -0.44, 1.89  0.25 | 0.24  0.41  -0.89, 1.36  -0.92, 1.35  0.682 | -1.18  -1.87  -2.41, 0.06  -2.41, 0.088  0.062 | | -0.19  -0.28  -1.49, 1.11  -1.44, 1.11  0.777 | 5.62 |
| 0.03  0.04 |
|  |  |  |  |  |  | |  |  |
| **Cow** | -0.03  -0.06  -0.99 – 0.93  -1.14, 1.01  0.95 | 1.87  3.83  0.91, 2.84  0.76, 3.04  **<0.001** | 0.96  0.52  -0.06, 1.97  -0.19, 2.21  0.064 | 0.046  0.09  -0.95, 1.04  -1.14, 1.29  0.93 | -1.27  -2.28  -2.36, -0.17  -2.59, -0.001  **0.023** | | -0.30  -0.52  -1.46, 0.85  -1.71, 1.00  0.60 | 4.45 |
| 0.17  0.00 |
|  |  |  |  |  |  | |  |  |
| **Elephant** | -0.035  -0.086  -0.89, 0.82  -0.86, 0.35  0.932 | 0.66  2.01  -0.066, 1.38  **0.045, 1.31**  0.078 | 0.51  1.47  -0.26, 1.27  -0.17, 1.19  0.18 |  |  | |  | 5.50 |
| 0.28  0.02 |
|  |  |  |  |  |  | |  |  |
| **Zebra** | 0.53  7.72  0.38, 0.68  0.39, 0.67  **<0.001** |  |  |  |  | |  | 3.39 |
| 0.00  0.00 |
|  |  |  |  |  |  | |  |  |
| **Impala** | 0.19  3.47  0.072, 0.311  0.062, 0.346  **0.006** | -0.16  -2.87  -0.284, -0.038  -0.315, -0.026  **0.02** | -0.15  -2.61  -0.283, -0.024  -0.313, -0.015  **0.03** |  |  | |  | 0.18 |
| 0.00  0.00 |
|  |  |  |  |  |  | |  |  |
| **Buffalo** | -0.22  -1.32  -0.60, 0.16  **-0.33, -0.12**  0.23 |  |  |  |  | |  | 2.20 |
| 0.10  0.05 |
|  |  |  |  |  |  | |  |  |
| **Giraffe** | -0.028  -0.50  -0.14, 0.085  -0.11, 0.052  0.62 |  |  | 0.11  2.00  0.002, 0.218  0.018, 0.207  **0.046** |  | |  | 0.46 |
| 0.00  0.00 |
|  |  |  |  |  |  | |  |  |
| **All Parasites** | 0.50  0.80  -0.73, 1.72  -0.66, 1.69  0.45 | 2.12  3.10  0.78, 3.46  0.82, 3.38  **0.01** | 0.99  1.37  -0.42, 2.40  -0.33, 2.30  0.20 |  |  | |  | 27.60 |
| 0.00  0.05 |
|  |  |  |  |  | **Legend:** | Estimate  t-value  95% Profile interval  95% Bootstrap interval  Pr(>|t|) | | |

Table S10. Post-hoc Tests for Log-Ratio LMMs

Post-hoc tests for models in Table S9 using Tukey correction for multiple comparisons. For best models that included an interaction between distance and experiment status, estimates reflect ratios at 0m outward distance. The converted ratios are shown in the far-right column of the table.

| **Species** | **Null Hypothesis** | **Estimate** | **SE** | **Z** | **P** | **95% CI: Log Ratio** | | **Ratio** |
| --- | --- | --- | --- | --- | --- | --- | --- | --- |
| **Lower** | **Upper** | **Estimate** |
|  |  |  |  |  |  |  |  |  |
| All | During - Pre == 0 | 1.973 | 0.597 | 3.307 | 0.003 ** | 0.584 | 3.361 | **7.189** |
| Post - Pre == 0 | 0.730 | 0.629 | 1.161 | 0.469 | -0.734 | 2.193 | 2.075 |
| Post - During == 0 | -1.243 | 0.398 | -3.125 | 0.005 ** | -2.168 | -0.317 | **0.289** |
|  |  |  |  |  |  |  |  |  |
| Cow | During - Pre == 0 | 0.924 | 0.258 | 3.578 | <0.001 *** | 0.323 | 1.525 | **2.519** |
| Post - Pre == 0 | 0.730 | 0.272 | 2.682 | 0.02 * | 0.097 | 1.364 | **2.075** |
| Post - During == 0 | -0.194 | 0.172 | -1.127 | 0.490 | -0.595 | 0.217 | 0.824 |
|  |  |  |  |  |  |  |  |  |
| Elephant | During - Pre == 0 | 0.659 | 0.328 | 2.01 | 0.106 | -0.104 | 1.423 | 1.933 |
| Post - Pre == 0 | 0.509 | 0.346 | 1.47 | 0.298 | -0.296 | 1.314 | 1.664 |
| Post - During == 0 | -0.150 | 0.219 | -0.69 | 0.766 | -0.659 | 0.359 | 0.861 |
|  |  |  |  |  |  |  |  |  |
| Impala | During - Pre == 0 | -0.161 | 0.056 | -2.873 | 0.011 * | -0.291 | -0.030 | **0.851** |
| Post - Pre == 0 | -0.153 | 0.059 | -2.605 | 0.024 * | -0.291 | -0.016 | **0.858** |
| Post - During == 0 | 0.007 | 0.037 | 0.190 | 0.980 | -0.080 | 0.094 | 1.007 |
|  |  |  |  |  |  |  |  |  |
| All  Parasites | During - Pre == 0 | 2.121 | 0.685 | 3.099 | 0.00527 ** | 0.528 | 3.714 | **8.339** |
| Post - Pre == 0 | 0.9898 | 0.722 | 1.372 | 0.348 | -0.689 | 2.669 | 2.691 |
| Post - During == 0 | -1.131 | 0.456 | -2.480 | 0.034 * | -2.193 | -0.0694 | **0.323** |

Table S11. Observational System Log-Ratio LMM Results

Coefficients and their 95% confidence intervals for best models of the log ratio of dung and parasite density at water sources versus dry sites. Coefficients indicating increased dung and parasite density at water relative to dry sites are shaded green, while those indicating decreased relative density are shaded orange. The intercept corresponds to the log ratio in dung density when all covariates are zero.

| **Species** | **Intercept** | **Distance** | **MAP** | **Rain** | **Distance:MAP** | | **Rain:MAP** | **Sigma/Site/Period** |
| --- | --- | --- | --- | --- | --- | --- | --- | --- |
|  |  |  |  |  |  | |  |  |
| All | 6.86  5.40  4.36, 9.36  4.49, 9.03  **<0.001** | -3.65  -2.56  -6.45, -0.85  -6.15, -1.05  **0.01** | -0.88  -3.90  -1.32, -0.44  -1.27, -0.46  **<0.001** | -0.92  -4.55  -1.33, -0.52  -1.32, -0.51  **<0.001** | 0.51  2.01  0.011, 1.00  0.049, 0.94  **0.045** | |  | 7.36 |
| 0.01  0.00 |
|  |  |  |  |  |  | |  |  |
| Cow | 2.42  4.35  1.31, 3.59  1.74, 3.34  **<0.001** | -0.63  -6.01  -0.83, -0.42  -0.83, -0.43  **<0.001** | -0.23  -2.40  -0.43, -0.04  -0.39, -0.11  **0.02** | -0.33  -2.17  -0.66, -0.033  -0.67, -0.068  **0.03** |  | |  | 3.28 |
| 0.03  0.02 |
|  |  |  |  |  |  | |  |  |
| Elephant | 3.91  4.92  2.27, 5.51  2.82, 4.85  **<0.001** | -0.718  -4.90  -1.01, -0.43  -1.01, -0.43  **<0.001** | -0.477  -3.46  -0.75, -0.19  -0.627, -0.300  **0.002** |  |  | |  | 6.42 |
| 0.07  0.01 |
|  |  |  |  |  |  | |  |  |
| Zebra | 2.16  2.66  0.56, 3.82  0.85, 3.86  **0.009** |  | -0.36  -2.49  -0.65, -0.075  -0.67, -0.13  **0.014** | -3.01  -2.66  -5.25, -0.78  -5.13, -1.36  **0.008** |  | | 0.48  2.44  0.092, 0.88  0.20, 0.87  **0.015** | 2.59 |
| 0.03  0.00 |
|  |  |  |  |  |  | |  |  |
| Impala | -0.56  -2.45  -1.01, -0.11  -1.06, -0.08  **0.015** | 0.83  3.44  0.36, 1.31  0.28, 1.44  **<0.001** | 0.11  2.62  0.026, 0.19  0.024, 0.19  **0.009** |  | -0.15  -3.48  -0.23, -0.065  -0.25, -0.056  **<0.001** | |  | 0.21 |
| 0.00  0.00 |
|  |  |  |  |  |  | |  |  |
| Buffalo | 0.28  3.21  0.092, 0.48  0.15, 0.45  **0.008** |  |  | -0.30  -2.88  -0.50, -0.095  -0.55, -0.093  **0.004** |  | |  | 1.38 |
| 0.00  0.02 |
|  |  |  |  |  |  | |  |  |
| Giraffe | 0.14  2.84  0.04, 0.24  0.063, 0.22  **0.01** |  |  | -0.18  -2.82  -0.32, -0.054  -0.32, -0.055  **0.007** |  | |  | 0.61 |
| 0.01  0.00 |
|  |  |  |  |  |  | |  |  |
| All Parasites | 9.42  5.94  6.31, 12.53  6.69, 11.79  **<0.001** | -1.48  -4.33  **-2.15, -0.81**  **-2.13, -0.83**  **<0.001** | -0.99  -3.58  -1.54, -0.45  -1.45, -0.52  **0.001** | -2.11  -4.74  -2.98, -1.24  -2.92, -1.06  **<0.001** |  | |  | 35.07 |
| 0.11  0.00 |
|  |  |  |  |  | **Legend:** | Estimate  t-value  95% Profile interval  95% Bias-corrected bootstrap interval  Pr(>|t|) | | |
|  |

Table S12. Experimental System GLMMs for Matrix Sites

GLMM hurdle model coefficients for comparisons between dry sites and filled water pans throughout the experimental study at Ol Pejeta Conservancy. Coefficients that indicate increased and decreased dung at water sources relative to dry sites are shaded in blue and orange respectively. There were no significant interactions between filled pans and experimental status for any species except impala.

|  | **All** | **Elephant** | **Cow** | **Zebra** | **Buffalo** | **Impala** | **Giraffe** | **Parasites** |
| --- | --- | --- | --- | --- | --- | --- | --- | --- |
| **Conditional Model** | |  |  |  |  |  |  |  |
| Intercept  (Pre, Dry, 0m) | 3.86  2.08, 5.65  **<0.001** | 4.22  1.80, 6.65  **0.001** | 3.16  1.58, 4.75  **<0.001** | 3.8  2.59, 5.01  **<0.001** | 4.28  2.84, 5.73  **<0.001** | 1.05  0.20, 1.90  **0.016** | 1.44  0.92, 1.96  **<0.001** | 24.95  13.3, 36.56  **<0.001** |
| During | -0.94  -2.8, 0.92  0.323 | -0.42  -2.46, 1.6  0.686 | -0.59  -2.1, 0.96  0.457 | -0.79  -1.98, 0.4  0.197 | -0.77  -2.16, 0.6  0.278 | -0.51  -1.44, 0.42  0.281 | -0.06  -0.44, 0.3  0.742 | -5.42  -17.45, 6.6  0.377 |
| Post | -0.92  -2.9, 1.05  0.36 | -0.32  -2.4, 1.77  0.767 | -1.15  -2.8, 0.45  0.16 | -0.63  -1.9, 0.67  0.345 | -1.36  -2.85, 0.1  0.074 | -0.62  -1.60, 0.35  0.211 | -0.03  -0.4, 0.36  0.884 | -4.76  -17.45, 7.9  0.462 |
| Filled | 2.35  1.47, 3.24  **<0.001** | 1.17  -1.0, 3.37  0.298 | 2.29  1.02, 3.56  **<0.001** | 0.23  -1.2, 1.66  0.755 | 0.32  -0.97, 1.6  0.622 | 0.25  -0.01, 0.50  0.062 | -0.61  -1.84, 0.6  0.331 | 14.15  7.66, 20.64  **<0.001** |
| ln(Dist+1) | -0.01  -0.15, 0.1  0.847 | 0.18  -0.2, 0.56  0.333 | 0.03  -0.14, 0.2  0.752 | -0.12  -0.3, 0.04  0.144 | 0.02  -0.16, 0.2  0.814 | -0.02  -0.04, 0.01  0.133 | 0.02  -0.07, 0.1  0.662 | -0.44  -1.40, 0.52  0.37 |
| During:  Filled | 0.1  -0.6, 0.77  0.773 | -0.12  -1.7, 1.45  0.877 | -0.53  -1.65, 0.6  0.351 | -0.04  -0.78, 0.7  0.919 | 0.43  -0.47, 1.3  0.353 | -0.38  -0.61, -0.15  **0.001** | 0.25  -0.38, 0.9  0.436 | -0.24  -5.12, 4.64  0.924 |
| Post:  Filled | 0.12  -0.6, 0.83  0.739 | -1.3  -2.9, 0.26  0.102 | -0.1  -1.22, 1.0  0.867 | -0.54  -1.39, 0.3  0.215 | 0.85  -0.3, 1.95  0.133 | -0.29  -0.52, -0.06  **0.012** | 0.21  -0.4, 0.86  0.524 | -1.37  -6.52, 3.78  0.602 |
| Filled:  ln(Dist+1) | -0.41  -0.58, -0.2  **<0.001** | -0.18  -0.6, 0.24  0.404 | -0.28  -0.47, -0.1  **0.005** | 0.01  -0.3, 0.33  0.937 | -0.22  -0.5, 0.06  0.122 | 0.03  -0.00, 0.06  0.096 | 0.07  -0.17, 0.3  0.569 | -1.5  -2.74, -0.25  **0.018** |
| **Zero-Inflated Model** | |  |  |  |  |  |  |  |
| (Int.) | -1.18  -2.7, 0.35  0.131 | 2.04  0.61, 3.46  **0.005** | 3.16  1.61, 4.72  **<0.001** | 0.15  -1.3, 1.57  0.838 | 1.39  -0.23, 3.0  0.092 | 1.5  -15.2, 18.2  0.86 | 1.37  0.01, 2.72  **0.048** | -1.14  -2.55, 0.26  0.11 |
| During | 0.82  -0.7, 2.37  0.297 | 0.52  -0.75, 1.8  0.422 | -1  -2.4, 0.42  0.167 | 1.06  -0.3, 2.44  0.131 | 1.11  -0.37, 2.6  0.141 | -10.09  -28.4, 8.23  0.28 | -0.08  -1.37, 1.2  0.905 | 0.93  -0.49, 2.36  0.199 |
| Post | 0.5  -1.1, 2.14  0.547 | -0.27  -1.6, 1.04  0.686 | -1.58  -3.06, -0.1  **0.035** | 1.51  0.03, 2.98  **0.045** | 1.05  -0.5, 2.63  0.19 | -11.16  -29.63, 7.3  0.236 | -0.1  -1.5, 1.26  0.881 | 0.61  -0.90, 2.11  0.43 |
| Filled | -1.9  -3.3, -0.48  **0.009** | -2.31  -3.6 – -1.1  **<0.001** | -4.52  -5.9 – -3.1  **<0.001** | 2.84  1.6 – 4.09  **<0.001** | -0.36  -1.7 – 1.0  0.596 | 1.35  -0.42 – 3.1  0.135 | 2.07  0.45, 3.69  **0.012** | -2.02  -3.36, -0.69  **0.003** |
| ln(Dist+1) | -0.05  -0.2, 0.09  0.51 | -0.03  -0.2, 0.16  0.734 | -0.14  -0.3, 0.04  0.121 | 0.09  -0.06, 0.2  0.223 | -0.03  -0.2, 0.16  0.721 | 0.02  -0.23, 0.27  0.889 | 0.05  -0.1, 0.2  0.522 | -0.04  -0.16, 0.09  0.589 |
| During:  Filled | -0.5  -1.5, 0.49  0.325 | -0.15  -1.1, 0.83  0.766 | 0.18  -0.86, 1.2  0.737 | -0.75  -1.5, 0.01  0.052 | -0.03  -0.98, 0.9  0.944 | -0.79  -1.82, 0.23  0.128 | 0.11  -0.9, 1.12  0.827 | -0.45  -1.38, 0.48  0.342 |
| Post:  Filled | -0.78  -1.87, 0.3  0.163 | -0.44  -1.4, 0.54  0.378 | -0.14  -1.2, 0.94  0.805 | -0.51  -1.35, 0.3  0.231 | 0.86  -0.29, 2.0  0.141 | 0.24  -0.89, 1.37  0.676 | 0.02  -1.0, 1.06  0.976 | -0.71  -1.71, 0.30  0.168 |
| Filled:  ln(Dist+1) | 0.3  0.03, 0.57  **0.028** | 0.49  0.26, 0.73  **<0.001** | 0.67  0.43, 0.92  **<0.001** | -0.81  -1.1, -0.55  **<0.001** | 0.22  -0.06, 0.5  0.12 | -0.37  -0.76, 0.02  0.06 | -0.43  -0.74, -0.1  **0.007** | 0.33  0.08, 0.58  **0.01** |
| **Random Effects** | |  |  |  |  |  |  |  |
| σ2 | 2.9 | 3.16 | 1.37 | 1.6 | 1.01 | 0.09 | 0.36 | 161.88 |
| τ00 Site | 0.06 | 0 | 0.06 | 0.01 | 0.02 | 0 | 0 | 1.71 |
| τ00 Period | 0.7 | 0.56 | 0.3 | 0.24 | 0.35 | 0.18 | 0 | 28.58 |
| N | 1440 | 1440 | 1440 | 1440 | 1440 | 1440 | 1440 | 1440 |
| M. R2 /  C. R2 | 0.097 /  0.285 |  | 0.178 /  0.347 | 0.055 /  0.182 | 0.085 /  0.329 | 0.174 /  0.724 |  | 0.098 /  0.240 |

Table S13. Experimental System Estimated Exposures

Estimates of parasite exposure ratios at permanently filled water pans relative to matrix sites for each focal herbivore species at Ol Pejeta Conservancy. P-value adjustment was performed using the Holm correction for multiple comparisons. Significant (padjusted<0.05) and marginally significant (padjusted<0.1) ratios are shown in red.

| Species | Scenario | Exposure ratio | SE | df | T ratio | Unadjusted p | Adjusted p |
| --- | --- | --- | --- | --- | --- | --- | --- |
| Buffalo | Low | **8.00** | 5.45 | 45 | 3.05 | 0.004 | 0.008 |
| Equal | 4.00 | 2.72 | 45 | 2.04 | 0.047 | 0.095 |
| High | 2.00 | 1.36 | 45 | 1.02 | 0.313 | 0.625 |
| Very High | 0.40 | 0.27 | 45 | -1.35 | 0.185 | 0.651 |
|  |  |  |  |  |  |  |  |
| Cattle | Low | **285.19** | 158.67 | 45 | 10.16 | <0.001 | <0.001 |
| Equal | **142.59** | 78.39 | 45 | 9.02 | <0.001 | <0.001 |
| High | **71.30** | 38.84 | 45 | 7.83 | <0.001 | <0.001 |
| Very High | **14.26** | 7.72 | 45 | 4.91 | <0.001 | <0.001 |
|  |  |  |  |  |  |  |  |
| Elephant | Low | **134.76** | 79.81 | 45 | 8.28 | <0.001 | <0.001 |
| Equal | **67.38** | 39.53 | 45 | 7.18 | <0.001 | <0.001 |
| High | **33.69** | 19.62 | 45 | 6.04 | <0.001 | <0.001 |
| Very High | **6.74** | 3.91 | 45 | 3.29 | 0.002 | 0.01 |
|  |  |  |  |  |  |  |  |
| Giraffe | Low | 5.44 | 4.91 | 45 | 1.88 | 0.067 | 0.067 |
| Equal | 2.72 | 2.47 | 45 | 1.10 | 0.277 | 0.277 |
| High | 1.36 | 1.24 | 45 | 0.34 | 0.738 | 0.738 |
| Very High | 0.27 | 0.25 | 45 | -1.42 | 0.163 | 0.651 |
|  |  |  |  |  |  |  |  |
| Impala | Low | **16.19** | 11.61 | 45 | 3.88 | <0.001 | 0.001 |
| Equal | **8.09** | 5.80 | 45 | 2.92 | 0.005 | 0.016 |
| High | 4.05 | 2.89 | 45 | 1.95 | 0.057 | 0.17 |
| Very High | 0.81 | 0.58 | 45 | -0.30 | 0.769 | 0.769 |
|  |  |  |  |  |  |  |  |
| Zebra | Low | **39.48** | 21.76 | 45 | 6.67 | <0.001 | <0.001 |
| Equal | **19.74** | 10.76 | 45 | 5.47 | <0.001 | <0.001 |
| High | **9.87** | 5.34 | 45 | 4.23 | <0.001 | <0.001 |
| Very High | 1.97 | 1.06 | 45 | 1.26 | 0.214 | 0.651 |

Table S14. Observational System Estimated Exposures

Estimates of parasite exposure ratios at dams relative to matrix sites for each focal herbivore species at Mpala Research Centre. P-value adjustment was performed using the Holm correction for multiple comparisons. Significant (padjusted<0.05) and marginally significant (padjusted<0.1) ratios are shown in red.

| Species | Scenario | Exposure ratio | SE | df | T ratio | Unadjusted p | Adjusted p |
| --- | --- | --- | --- | --- | --- | --- | --- |
| Buffalo | Low | **168.81** | 315.11 | 129 | 2.75 | 0.007 | 0.027 |
| Equal | 85.03 | 156.61 | 129 | 2.41 | 0.017 | 0.086 |
| High | 42.84 | 78.02 | 129 | 2.06 | 0.041 | 0.205 |
| Very High | 8.79 | 15.71 | 129 | 1.22 | 0.226 | 0.783 |
| Cattle | Low | **25.32** | 28.74 | 129 | 2.85 | 0.005 | 0.026 |
| Equal | 12.87 | 14.39 | 129 | 2.28 | 0.024 | 0.096 |
| High | 6.58 | 7.27 | 129 | 1.70 | 0.091 | 0.364 |
| Very High | 1.41 | 1.55 | 129 | 0.31 | 0.754 | 1.00 |
| Elephant | Low | **76.74** | 78.29 | 129 | 4.25 | <0.001 | <0.001 |
| Equal | **38.59** | 38.59 | 129 | 3.65 | <0.001 | 0.002 |
| High | **19.43** | 19.12 | 129 | 3.02 | 0.003 | 0.019 |
| Very High | 3.96 | 3.83 | 129 | 1.42 | 0.157 | 0.783 |
| Giraffe | Low | 6.89 | 17.42 | 129 | 0.76 | 0.446 | 0.893 |
| Equal | 3.42 | 8.61 | 129 | 0.49 | 0.627 | 1.00 |
| High | 1.70 | 4.28 | 129 | 0.21 | 0.833 | 1.00 |
| Very High | 0.34 | 0.86 | 129 | -0.43 | 0.67 | 1.00 |
| Impala | Low | 1.10 | 1.74 | 129 | 0.06 | 0.952 | 0.952 |
| Equal | 0.59 | 0.93 | 129 | -0.33 | 0.739 | 1.00 |
| High | 0.32 | 0.50 | 129 | -0.73 | 0.469 | 1.00 |
| Very High | 0.08 | 0.12 | 129 | -1.61 | 0.109 | 0.654 |
| Zebra | Low | 3.44 | 3.78 | 129 | 1.12 | 0.264 | 0.793 |
| Equal | 1.83 | 2.01 | 129 | 0.55 | 0.581 | 1.00 |
| High | 0.98 | 1.07 | 129 | -0.02 | 0.986 | 1.00 |
| Very High | 0.23 | 0.26 | 129 | -1.32 | 0.189 | 0.783 |

SI References

1. C. L. Nunn, S. M. Altizer, The global mammal parasite database: An online resource for infectious disease records in wild primates. *Evol. Anthropol. Issues, News, Rev.* **14**, 1–2 (2005).

2. D. I. Gibson, R. A. Bray, E. A. Harris, Host-Parasite Database of the Natural History Museum, London (2005).

3. M. C. Round, *Check list of the helminth parasites of African mammals of the orders Carnivora, Tubulidentata, Proboscidea, Hyra-coidea, Artiodactyla and Perissodactyla.* (Farnham Royal: Commonwealth Agricultural Bureaux, 1968).

4. M. T. Fox, Gastrointestinal Parasites of Sheep and Goats - Digestive System. *Merck Vet. Man.* (2014).

5. M. T. Fox, Gastrointestinal Parasites of Cattle - Digestive System. *Merck Vet. Man.* (2014).

6. M. Thorn, D. M. Scott, M. Green, P. W. Bateman, E. Z. Cameron, Estimating Brown Hyaena Occupancy Using Baited Camera Traps. *South African J. Wildl. Res.* **39**, 1–10 (2009).

7. M. Chame, Terrestrial Mammal Feces: A Morphometric Summary and Description. *Mem. Inst. Oswaldo Cruz* **98**, 71–94 (2003).

8. A. Kuznetsova, P. B. Brockhoff, R. H. B. Christensen, lmerTest Package: Tests in Linear Mixed Effects Models. *J. Stat. Softw.* **82** (2017).

9. H.-T. Thai, F. Mentré, N. H. G. Holford, C. Veyrat-Follet, E. Comets, A comparison of bootstrap approaches for estimating uncertainty of parameters in linear mixed-effects models. *Pharm. Stat.* **12**, 129–140 (2013).

10. M. L. Delano, S. A. Mischler, W. J. Underwood, “Biology and Diseases of Ruminants: Sheep, Goats, and Cattle” in *Laboratory Animal Medicine*, (Elsevier, 2002), pp. 519–614.

11. E. Ghadirian, F. Arfaa, First report of human infection with Haemonchus contortus, Ostertagia ostertagi, and Marshallagia marshalli (family trichostrongylidae) in Iran. *J. Parasitol.* **59**, 1144–1145 (1973).

12. R. K. Keith, The pathogenicity of experimental infections of cooperia pectinata ransom, 1907 in calves. *Aust. J. Agric. Res.* **18**, 861–864 (1967).

13. J. E. Alicata, F. T. Lynd, Growth rate and other signs of infection in calves experimentally infected with Cooperia punctata. *Am. J. Vet. Res.* **22**, 704–707 (1961).

14. R. L. Coop, A. R. Sykes, K. W. Angus, The pathogenicity of daily intakes of Cooperia oncophora larvae in growing calves. *Vet. Parasitol.* **5**, 261–269 (1979).

15. T. E. Gibson, Studies on Trichostrongylus axei IV Factors in the causation of pathogenic effects by T. axei. *J. Comp. Path.* **65**, 317–324 (1955).

16. G. Cancrini, G. Boemi, A. Iori, A. Corselli, Infestazioni umane da Trichostrongylus axei, T. capricola e T. vitrinus: prima segnalazione in Italia. *Parassitologia* **24**, 145–149 (1982).

17. I. Ziomko, Experimental invasion of Strongyloides papillosus (Wedl, 1856) in sheep. *Bull. Vet. Inst. Pulawy* **44**, 179–186 (2000).

18. P. H. Holmes, Pathogenesis of trichostrongylosis. *Vet. Parasitol.* **18**, 89–101 (1985).

19. M. Sato, *et al.*, Human trichostrongylus colubriformis infection in a rural village in Laos. *Am. J. Trop. Med. Hyg.* **84**, 52–54 (2011).

20. F. Roeber, A. R. Jex, R. B. Gasser, “Next-Generation Molecular-Diagnostic Tools for Gastrointestinal Nematodes of Livestock, with an Emphasis on Small Ruminants. A Turning Point?” in *Advances in Parasitology*, (Academic Press, 2013), pp. 267–333.

21. S. Dalal, A. Prasad, A. Nasir, V. K. Saini, Cross antigenicity of immunodominant polypeptides of somatic antigen of Oesophagostomum columbianum with other helminths by western blotting. *Vet. World* **8**, 1279–1285 (2015).

22. J. Owen, D. Slocombe, Pathogenesis of helminths in equines. *Vet. Parasitol.* **18**, 139–153 (1985).

23. X. Cao, A. N. Vidyashankar, M. K. Nielsen, Association between large strongyle genera in larval cultures--using rare-event poisson regression. *Parasitology* **140**, 1246–1251 (2013).

24. Z. Ansari, K. Suresh Singh, Effect of gamma-irradiation on the survival and development of the infective larvae of the hookworm, Gaigeria pachyscelis*. *J. ofHelminthology* **52**, 283–286 (2020).

25. H. Herlich, L. C. Gasbarre, F. W. Douvres, Infectivity and pathogenicity of three isolates of Ostertagia ostertagi in cattle. *Vet. Parasitol.* **16**, 253–260 (1984).

26. F. C. Fávero, *et al.*, Experimental infection of calves with Haemonchus placei or Haemonchus contortus: Assessment of clinical, hematological and biochemical parameters and histopathological characteristics of abomasums. *Exp. Parasitol.* **170**, 125–134 (2016).

27. I. J. East, C. J. Fitzgerald, D. A. Berrie, Oesophagostomum radiatum: the effect of different adjuvants on vaccination with a partially purified protective antigen. *Vet. Parasitol.* **49**, 191–200 (1993).

28. C. R. Wang, J. F. Gao, X. Q. Zhu, Q. Zhao, Characterization of Bunostomum trigonocephalum and Bunostomum phlebotomum from sheep and cattle by internal transcribed spacers of nuclear ribosomal DNA. *Res. Vet. Sci.* **92**, 99–102 (2012).

29. A. Samizadeh-Yazd, A. C. Todd, Observations on the pathogenic effects of Nematodirus helvetianus in dairy calves. *Am. J. Vet. Res.* **40**, 48–51 (1979).

30. D. Van Aken, *et al.*, Pathophysiological aspects of Mecistocirrus digitatus (Nematoda: Trichostrongylidae) infection in calves. *Vet. Parasitol.* **69**, 255–263 (1997).

31. M. J. Stear, S. C. Bishop, N. G. Henderson, I. Scott, A key mechanism of pathogenesis in sheep infected with the nematode Teladorsagia circumcincta. *Anim. Heal. Res. Rev.* **4** (2003).

32. K. Ashrafi, M. Sharifdini, Z. Heidari, B. Rahmati, E. B. Kia, Zoonotic transmission of Teladorsagia circumcincta and Trichostrongylus species in Guilan province, northern Iran: Molecular and morphological characterizations. *BMC Infect. Dis.* **20**, 1–9 (2020).

33. R. P. Herd, The pathogenic importance of Chabertia ovina (Fabricius, 1788) in experimentally infected sheep. *Int. J. Parasitol.* **1**, 251–263 (1971).

34. L. Seghetti, C. M. Senger, Experimental infections in lambs with Nematodirus spathiger. *Am. J. Vet. Res.* **19**, 642–644 (1958).

35. R. L. Coop, K. W. Angus, A. R. Sykes, Chronic infection with Trichostrongylus vitrinus in sheep. Pathological changes in the small intestine. *Res. Vet. Sci.* **26**, 363–371 (1979).

36. B. R. Beechler, H. Broughton, A. Bell, V. O. Ezenwa, A. E. Jolles, Innate immunity in free-ranging African buffalo (Syncerus caffer): Associations with parasite infection and white blood cell counts. *Physiol. Biochem. Zool.* **85**, 255–264 (2012).

37. A. Caron, P. C. Cross, J. T. du Toit, Ecological implications of bovine tuberculosis in African buffalo herds. *Ecol. Appl.* **13**, 1338–1345 (2003).

38. V. O. Ezenwa, Habitat overlap and gastrointestinal parasitism in sympatric African bovids. *Parasitology* **126**, 379–388 (2003).

39. V. O. Ezenwa, Interactions among host diet, nutritional status and gastrointestinal parasite infection in wild bovids. *Int. J. Parasitol.* **34**, 535–542 (2004).

40. V. O. Ezenwa, A. E. Jolles, Horns honestly advertise parasite infection in male and female African buffalo. *Anim. Behav.* **75**, 2013–2021 (2008).

41. E. E. Gorsich, V. O. Ezenwa, A. E. Jolles, Nematode-coccidia parasite co-infections in African buffalo: Epidemiology and associations with host condition and pregnancy. *Int. J. Parasitol. Parasites Wildl.* **3**, 124–34 (2014).

42. B. L. Penzhorn, Coccidian oocyst and nematode egg counts of free-ranging African buffalo (Syncerus caffer) in the Kruger National Park, South Africa. *J. S. Afr. Vet. Assoc.* **71**, 106–108 (2000).

43. A. D. Agyei, Epidemiological observations on helminth infections of calves in southern Ghana. *Trop. Anim. Health Prod.* **23**, 134–140 (1991).

44. D. L. Brito, *et al.*, Effect of alternate and simultaneous grazing on endoparasite infection in sheep and cattle. *Rev. Bras. Parasitol. Veterinária* **22**, 485–494 (2013).

45. H. Degefu, C. Abera, M. Yohannes, T. Tolosa, Gastrointestinal helminth infections in small-scale dairy cattle farms of Jimma town, Ethiopia. *Ethiop. J. Appl. Sci. Technol.* **2**, 31–37 (2011).

46. W. Kabaka, G. Gitau, P. Kitala, N. Maingi, J. Van Leeuwen, The prevalence of gastrointestinal nematode infection and their impact on cattle in Nakuru and Mukurweini districts of Kenya. *Ethiop. Vet. J.* **17**, 95 (2014).

47. P. W. N. Kanyari, J. M. Kagira, J. R. L. Mhoma, Prevalence of endoparasites in cattle within urban and peri-urban areas of Lake Victoria Basin, Kenya with special reference to zoonotic potential. *Sci. Parasitol.* **11**, 171–178 (2010).

48. J. D. Keyyu, N. C. Kyvsgaard, J. Monrad, A. A. Kassuku, Epidemiology of gastrointestinal nematodes in cattle on traditional, small-scale dairy and large-scale dairy farms in Iringa district, Tanzania. *Vet. Parasitol.* **127**, 285–294 (2005).

49. S. E. Knafo, “Distribution of gastrointestinal parasites of Grevy’s zebras, plains zebras, domestic donkeys, and domestic cattle in the Samburu landscape, Kenya,” Tufts University. (2008).

50. T. Ndlovu, M. Chimonyo, V. Muchenje, Monthly changes in body condition scores and internal parasite prevalence in Nguni, Bonsmara and Angus steers raised on sweetveld. *Trop. Anim. Health Prod.* **41**, 1169–1177 (2009).

51. P. Sun, T. Wronski, J. D. Bariyanga, A. Apio, Gastro-intestinal parasite infections of Ankole cattle in an unhealthy landscape: An assessment of ecological predictors. *Vet. Parasitol.* **252**, 107–116 (2018).

52. R. M. Waruiru, *et al.*, The Prevalence and Intensity of Helminth and Coccidial Infections in Dairy Cattle in Central Kenya. *Vet. Res. Commun.* **24**, 39–53 (2000).

53. L. Baines, E. R. Morgan, M. Ofthile, K. Evans, Occurrence and seasonality of internal parasite infection in elephants, Loxodonta africana, in the Okavango Delta, Botswana. *Int. J. Parasitol. Parasites Wildl.* **4**, 43–48 (2015).

54. K. N. Brumfitt, “Assesment of body condition of African elephants (Loxodonta africana) in North East of Etosha National Park, Namibia: How it relates to strongyle parasite eggs counts and nutrition value of feed,” University of Namibia. (2005).

55. E. King’ori, *et al.*, Patterns of helminth infection in Kenyan elephant populations. *Parasites and Vectors* **13**, 1–12 (2020).

56. J. M. Parker, S. Z. Goldenberg, D. Letitiya, G. Wittemyer, Strongylid infection varies with age, sex, movement and social factors in wild African elephants. *Parasitology* **147**, 348–359 (2020).

57. M. I. Thurber, *et al.*, Effects of rainfall, host demography, and musth on strongyle fecal egg counts in African elephants (Loxodonta Africana) in Namibia. *J. Wildl. Dis.* **47**, 172–181 (2011).

58. C. P. Melbourne, Observations on the Treatment of Endoparasites of Giraffes at Longleat Safari Park. *J. Zoo Anim. Med.* **9**, 146 (1978).

59. K. VanderWaal, G. P. Omondi, V. Obanda, Mixed-host aggregations and helminth parasite sharing in an East African wildlife-livestock system. *Vet. Parasitol.* **205**, 224–232 (2014).

60. K. S. Nalubamba, N. B. Mudenda, M. R. Malamo, A seasonal survey of gastrointestinal parasites in captive wild impala antelope on a game facility south of Lusaka, Zambia. *J. Helminthol.* **86**, 418–425 (2012).

61. M. Ocaido, L. Siefert, J. Baranga, Seasonal changes of impala (Aepyceros melampus, Lichtenstein, 1812) faecal helminth egg counts through a one-year period. *Afr. J. Ecol.* **37**, 327–333 (1999).

62. M. S. Mwatenga, “Gastrointestinal parasites infesting Grevy’s zebra (Equus Grevyi) in the Samburu landscape in Samburu county,” Kenyatta University. (2017).

63. D. I. Rubenstein, *Ecology, social behavior, and conservation in zebras* (Academic Press, 2010).

64. M. C. Fugazzola, L. Stancampiano, Host social rank and parasites: Plains zebra (Equus quagga) and intestinal helminths in Uganda. *Vet. Parasitol.* **188**, 115–119 (2012).

65. R. C. Krecek, R. K. Reinecke, F. S. Malan, Studies on the parasites of zebras. V. Nematodes of the Burchell’s and Hartmann’s mountain zebras from the Etosha National Park, South West Africa/Namibia. *Onderstepoort J. Vet. Res.* **54**, 71–78 (1987).

66. W. C. Turner, “The Ecology of Orally Ingested Parasites in Ungulates of Etosha National Park,” University of California, Berkeley. (2009).

67. E. N. Wambwa, W. O. Ogara, D. Mudakha, A comparative study of gastrointestinal parasites between ranched and free ranging Burchell’s zebra (Equus burchelli antiquorum) in Isiolo district, Kenya. *J. Vet. Sci.* **5**, 215–220 (2004).
